# Supplementary material for: Azido-enabled thermal history analysis on a metal–oxide surface
Source: Royal Society of Chemistry journal article supplement (doi:10.1039/d5nr01176k), 2025-01-01
Supplement: d5nr01176k1.pdf [file d5nr01176k1.pdf]

## Supplementary Information

### Azido-enabled thermal history analysis on metal-oxide surface

Satoki Yamaguchi, Tomohiro Iwai,\* Hiromichi V. Miyagishi, Hiroshi Masai, Takuro

Hosomi, Takeshi Yanagida, Ken Uchida and Jun Terao\*

*E-mail: ciwai@g.ecc.u-tokyo.ac.jp (T.I.), cterao@g.ecc.u-tokyo.ac.jp (J.T.)*

|                                                                                     |     |
|-------------------------------------------------------------------------------------|-----|
| <b>1. Materials</b>                                                                 | S2  |
| <b>2 Experimental equipment</b>                                                     | S2  |
| <b>3. Synthetic procedures of 1 and 2</b>                                           | S3  |
| <b>4. Synthetic procedures of molecular probes for SEM-EDS analysis</b>             | S7  |
| <b>5. TG analysis of organic azides</b>                                             | S9  |
| <b>6. Surface Modification on ZnO nanowire arrays and characterization</b>          |     |
| 6.1. Procedure of ZnO nanowires grown on a Si substrate                             | S9  |
| 6.2. Surface modification of ZnO nanowires                                          | S10 |
| 6.3. FT-IR analysis of azido-functionalized ZnO nanowires heated on a hotplate      | S10 |
| 6.4. Surface Huisgen cycloaddition on ZnO nanowires                                 | S12 |
| 6.5. SEM-EDS analysis on ZnO nanowires                                              | S12 |
| 6.6. Molecular probes for SEM-EDS analysis                                          | S13 |
| 6.7. SEM-EDS spectral change depending on heating time using <b>1/ZnO-NW</b>        | S14 |
| 6.8. SEM-EDS spectral change depending on heating temperature using <b>1/ZnO-NW</b> | S14 |
| 6.9. SEM-EDS spectral change depending on heating temperature using <b>2/ZnO-NW</b> | S15 |
| 6.10. Preparation of calibration curve                                              | S15 |
| 6.11. Comparison between FT-IR and SEM-EDS analysis in thermal history              | S23 |
| 6.12. Fabrication of <b>1/ZnO-NW/Pt</b>                                             | S24 |
| 6.13. Local Joule heating of <b>1/ZnO-NW/Pt</b>                                     | S25 |
| <b>7. NMR Data</b>                                                                  | S29 |
| <b>8. References</b>                                                                | S36 |

## **1. Materials**

Unless otherwise noted, manipulations for organic synthesis were performed under nitrogen atmosphere using standard Schlenk-type glassware in a dual-manifold Schlenk line. Unless otherwise stated, commercially available chemicals were used as received. Dehydrated toluene, tetrahydrofuran, dichloromethane, and *N,N*-dimethylformamide (DMF) were purchased from KANTO CHEMICAL Co., Inc., and further purified by passage through activated alumina under positive nitrogen pressure as described by Grubbs *et al.*<sup>1</sup> Si(100) substrates (double side polished, 700–800  $\Omega$ , n-type) for ZnO nanowires (NWs) fabrication were purchased. Si(100) substrates with SiO<sub>2</sub> layer (300 nm) were purchased from S.E.H. Silicon Wafers.

## **2. Experimental equipment**

**NMR spectroscopy:** <sup>1</sup>H NMR (500 MHz), <sup>13</sup>C {<sup>1</sup>H} NMR (126 MHz), and <sup>31</sup>P {<sup>1</sup>H} NMR (202 MHz) spectra were measured with a Bruker AVANCE-500 spectrometer. The <sup>1</sup>H NMR chemical shifts are reported relative to tetramethylsilane (0.00 ppm), or residual protonated solvents in dimethyl sulfoxide-*d*<sub>6</sub> (DMSO, 2.54 ppm). The <sup>13</sup>C NMR chemical shifts are reported relative to deuterated solvents (CDCl<sub>3</sub>, 77.16 ppm or DMSO-*d*<sub>6</sub>, 41.23 ppm). The <sup>31</sup>P NMR spectra were also recorded using 85% H<sub>3</sub>PO<sub>4</sub> as an external standard.

**High-resolution mass spectroscopy (HR-MS):** Electrospray ionization time-of-flight (ESI-ToF) mass spectra were obtained using a Bruker micrOTOF II-KE02. The HR-MS spectra were internally calibrated using sodium trifluoroacetate cluster ions. Atmospheric Pressure Chemical Ionization (APCI)-orbitrap-MS was obtained using a Thermo Fisher Scientific Exactive Plus in Mass Spectrometry Room in Graduate School of Engineering, Kyoto University.

**Preparative recycling gel permeation chromatography (GPC):** Preparative recycling GPC was performed with a JAI LaboACE LC-5060 equipped with JAIGEL-1HH column, using CHCl<sub>3</sub> as the eluent at flow rate of 7.5 mL min<sup>-1</sup>, a JAI LaboACE LC-5060 PlusII equipped with JAIGEL-1HH column, using CHCl<sub>3</sub> as the eluent at flow rate of 7.5 mL min<sup>-1</sup>, or a JAI LaboACE LC-5060 PlusII equipped with JAIGEL-1H column, using CHCl<sub>3</sub> as the eluent at flow rate of 14 mL min<sup>-1</sup>.

**Thermogravimetric analysis (TG):** TG was conducted with a Thermo Plus 2 thermogravimetric analyzer (Rigaku) with  $\alpha$ -Al<sub>2</sub>O<sub>3</sub> as a reference.

**Fourier transform infrared spectroscopy (FT-IR):** The FT-IR spectra were recorded on a Thermo Fisher Scientific Nicolet iS50 FT-IR spectrometer equipped with a mercury-cadmium-telluride detector. The test room was constantly purged with dry air. The FT-IR spectra of the surface molecules immobilized on the ZnO NWs were recorded at room temperature. 300 scans

were accumulated to obtain each spectrum with a resolution of 4 cm<sup>-1</sup>. FT-IR spectra of bare ZnO NWs were used as the background spectrum for the other measurements.

**Scanning electron microscopy-energy dispersive X-ray spectrometry (SEM-EDS):** Scanning electron microscope (SEM) images equipped with EDS were acquired using a JEOL JSM-7610F.

**Laser lithography:** Laser lithography was performed with Heidelberg Instruments  $\mu$ PG 101 UOW1 at an energy of 40 mW.

**Sputtering:** Radio Frequency (RF) sputtering (Seinan, order-made) was used.

**UV-O<sub>3</sub> cleaner:** UV ozone cleaning was performed using UV Ozone Cleaner UV-1 (SAMCO).

**Flash column chromatography:** Flash column chromatography was performed using Isolera One (Biotage).

### 3. Synthetic procedures of 1 and 2

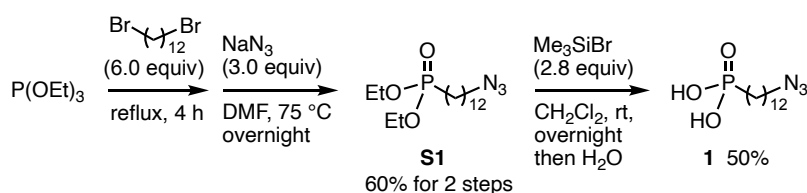

**Scheme S1** Synthetic routes to 1.

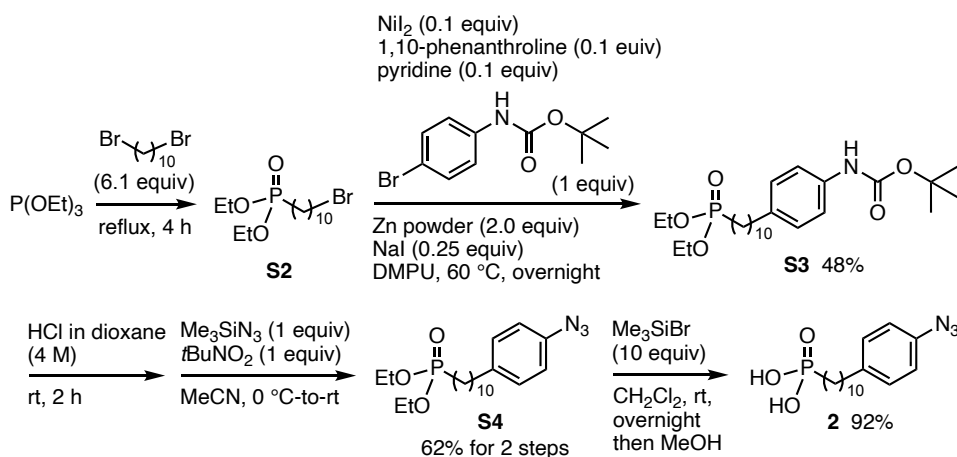

**Scheme S2** Synthetic routes to 2.

### [Compound S1]

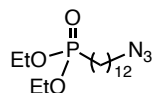

A mixture of triethylphosphite (2.00 mL, 11.6 mmol) and 1,12-dibromododecane (22.9 g, 69.8 mmol, 6.0 equiv) was heated under reflux for 4 h. The excess 1,12-dibromododecane was removed by distillation, and then the crude product was further purified by silica gel column chromatography (*n*-hexane/ethyl acetate 3:1 to 1:1). The resulting product was used for the next reaction without further purification.

A solution of the product (3.07 g, 7.97 mmol) and sodium azide (1.58 g, 24.3 mmol, 3.0 equiv) in dehydrated DMF (80 mL) was stirred overnight at 75 °C. After cooling to room temperature, brine (80 mL) was added. The mixture was extracted with ethyl acetate (3 times). The combined organic layers were washed with brine (5 times) and then concentrated to give **S1** as a pale yellow oil (2.41 g, 6.95 mmol, 60% yield for 2 steps).

<sup>1</sup>H NMR (CDCl<sub>3</sub>, 500 MHz): δ 4.13–4.05 (m, 4H, -O-CH<sub>2</sub>-), 3.26 (t, *J* = 7.0 Hz, 2H, N<sub>3</sub>-CH<sub>2</sub>-), 1.75–1.68 (m, 2H, P-CH<sub>2</sub>-), 1.65–1.55 (m, 4H, N<sub>3</sub>-CH<sub>2</sub>-CH<sub>2</sub>- and P-CH<sub>2</sub>-CH<sub>2</sub>-), 1.38–1.27 (m, 22H, -CH<sub>2</sub>- and -O-CH<sub>2</sub>-CH<sub>3</sub>). The <sup>1</sup>H NMR spectrum was consistent with those previously reported (Fig. S22).<sup>2</sup>

### [Compound 1]

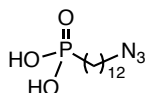

A solution of **S1** (844 μL, 3.47 mmol) and trimethylsilyl bromide (1.24 mL, 9.53 mmol, 2.8 equiv) in dehydrated dichloromethane was stirred under nitrogen atmosphere overnight at room temperature. After removal of volatiles under vacuum, water (8 mL) was added, and the mixture was stirred overnight at room temperature. The resulting white solid was filtered and dried under vacuum to give **1** as a white solid (506 mg, 1.74 mmol, 50% yield).

<sup>1</sup>H NMR (CDCl<sub>3</sub>, 500 MHz): δ 3.26 (t, *J* = 7.0 Hz, 2H, N<sub>3</sub>-CH<sub>2</sub>-), 1.79–1.72 (m, 2H, P-CH<sub>2</sub>-), 1.64–1.57 (m, 4H, N<sub>3</sub>-CH<sub>2</sub>-CH<sub>2</sub>- and P-CH<sub>2</sub>-CH<sub>2</sub>-), 1.38–1.27 (m, 16H). The <sup>1</sup>H NMR spectrum was consistent with those previously reported (Fig. S23).<sup>2</sup>

### [Compound S2]

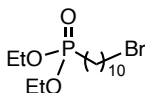

A mixture of triethylphosphite (2.17 mL, 12.5 mmol) and 1,10-dibromodecane (22.9 g, 76.4 mmol, 6.1 equiv) was heated under reflux for 4 h. The excess 1,10-dibromodecane was distilled off under vacuum, and then the crude product was purified by silica gel column chromatography (*n*-hexane/ethyl acetate 1:1) to give **S2** as an orange oil (1.86 g, 5.21 mmol, 42% yield).

<sup>1</sup>H NMR (CDCl<sub>3</sub>, 500 MHz): δ 4.15–4.03 (m, 4H, -O-CH<sub>2</sub>-), 3.41 (t, *J* = 6.9 Hz, 2H, Br-CH<sub>2</sub>-), 1.88–1.82 (m, 2H, Br-CH<sub>2</sub>-CH<sub>2</sub>-), 1.75–1.68 (m, 2H, P-CH<sub>2</sub>-), 1.64–1.55 (m, 2H, P-CH<sub>2</sub>-CH<sub>2</sub>-), 1.46–1.28 (m, 18H, -CH<sub>2</sub>- and -O-CH<sub>2</sub>-CH<sub>3</sub>). The <sup>1</sup>H NMR spectrum was consistent with those previously reported (Fig. S24).<sup>3</sup>

### [Compound S3]

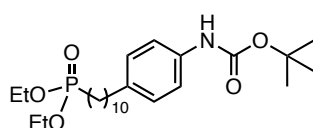

A mixture of **S2** (625 μL, 2.80 mmol), *tert*-butyl (4-bromophenyl)carbamate (763 mg, 2.80 mmol, 1.0 equiv), Zn powder (367 mg, 5.61 mmol, 2.0 equiv), NaI (105 mg, 0.698 mol, 0.25 equiv), NiI<sub>2</sub> (89.4 mg, 0.286 mmol, 0.10 equiv), 1,10-phenanthroline (50.8 mg, 0.282 mmol, 0.10 equiv), and pyridine (22.6 μL, 0.282 mmol, 0.10 equiv) in *N,N'*-dimethylpropyleneurea (DMPU, 40 mL) degassed with N<sub>2</sub> bubbling was stirred under nitrogen atmosphere overnight at 60 °C. After cooling to room temperature, Zn powder was removed by filtration. *n*-Hexane and ethyl acetate were added to the filtrate, and the mixture was washed with water (3 times). The organic layer was dried over MgSO<sub>4</sub>, filtered, and evaporated under vacuum. The residue was purified by silica gel column chromatography (*n*-hexane/ethyl acetate 3:1) followed by GPC with chloroform as the eluent to give **S3** as a yellow oil (629 mg, 1.34 mmol, 48% yield).

<sup>1</sup>H NMR (CDCl<sub>3</sub>, 500 MHz): δ 7.28 (d, *J* = 8.0 Hz, 2H, ArH), 7.07 (d, *J* = 8.5 Hz, 2H, ArH), 6.85 (s, 1H, Ar-NH-), 4.13–4.04 (m, 4H, -O-CH<sub>2</sub>-), 2.53 (t, *J* = 7.7 Hz, 2H, Ar-CH<sub>2</sub>-), 1.75–1.68 (m, 2H, P-CH<sub>2</sub>-), 1.63–1.51 (m, 13H, Ar-CH<sub>2</sub>-CH<sub>2</sub>-, P-CH<sub>2</sub>-CH<sub>2</sub>-, and -C(CH<sub>3</sub>)<sub>3</sub>), 1.38–1.25 (m, 18H, -CH<sub>2</sub>- and -O-CH<sub>2</sub>-CH<sub>3</sub>) (Fig. S25).

<sup>13</sup>C NMR (CDCl<sub>3</sub>, 126 MHz): δ 153.06, 137.43, 136.14, 128.73, 118.72, 80.04, 61.36 (d, *J* = 6.6 Hz), 35.21, 31.52, 30.59 (d, *J* = 17.1 Hz), 29.47, 29.42, 29.32, 29.13, 29.06, 28.38, 25.68 (d, *J* = 140.6 Hz), 22.38 (d, *J* = 5.4 Hz), 16.48 (d, *J* = 5.9 Hz) (Fig. S26).

<sup>31</sup>P NMR (CDCl<sub>3</sub>, 202 MHz): δ 33.15 (Fig. S27).

HR-MS (ESI-ToF-MS) *m/z*: [**S3**+Na]<sup>+</sup> calcd for C<sub>25</sub>H<sub>44</sub>NO<sub>5</sub>PNa 492.2849, found 492.2858.

### [Compound S4]

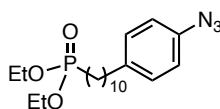

A solution of **S3** (321 mg, 0.683 mmol) in HCl in dioxane (4 M, 3.2 mL) was stirred for 2 h at room temperature. After quenching with NaHCO<sub>3</sub> aq., and the resulting mixture was extracted with ethyl acetate (3 times). The combined organic layers were dried over MgSO<sub>4</sub>, filtered, and evaporated in vacuum. The crude product was used for the next reaction without further purification.

To a solution of the product (190 mg, 0.514 mmol) in dehydrated acetonitrile (6 mL), trimethylsilyl azide (673  $\mu$ L, 5.14 mmol, 10 equiv) and *tert*-butyl nitrite (609  $\mu$ L, 5.14 mmol, 10 equiv) were sequentially added dropwise under nitrogen atmosphere at 0 °C. The solution was stirred at 0 °C for 30 min and then allowed to warm to room temperature and stirred for an additional 4 h. After removal of volatiles under vacuum, the residue was purified by GPC with chloroform as the eluent to give **S4** as a yellow oil (145 mg, 0.366 mmol, 62% yield for 2 steps).

<sup>1</sup>H NMR (CDCl<sub>3</sub>, 500 MHz):  $\delta$  7.15 (d,  $J$  = 8.4 Hz, 2H, ArH), 6.94 (d,  $J$  = 8.5 Hz, 2H, ArH), 4.13–4.05 (m, 4H, -O-CH<sub>2</sub>-), 2.57 (t,  $J$  = 7.7 Hz, 2H, Ar-CH<sub>2</sub>-), 1.75–1.68 (m, 2H, P-CH<sub>2</sub>-), 1.63–1.54 (m, 4H, Ar-CH<sub>2</sub>-CH<sub>2</sub>- and P-CH<sub>2</sub>-CH<sub>2</sub>-), 1.37–1.26 (m, 18H, -CH<sub>2</sub>- and -O-CH<sub>2</sub>-CH<sub>3</sub>) (Fig. S28).

<sup>13</sup>C NMR (CDCl<sub>3</sub>, 126 MHz):  $\delta$  139.86, 137.39, 129.82, 118.96, 61.51 (d,  $J$  = 6.3 Hz), 35.42, 31.60, 30.72 (d,  $J$  = 17.1 Hz), 29.61, 29.55, 29.47, 29.30, 29.20, 25.82 (d,  $J$  = 140.5 Hz), 22.52 (d,  $J$  = 5.5 Hz), 16.61 (d,  $J$  = 5.9 Hz) (Fig. S29).

<sup>31</sup>P NMR (CDCl<sub>3</sub>, 202 MHz):  $\delta$  33.20 (Fig. S30).

HR-MS (ESI-ToF-MS)  $m/z$ : [**S4**+Na]<sup>+</sup> calcd for C<sub>20</sub>H<sub>34</sub>NO<sub>3</sub>PNa 418.2230, found 418.2259.

### [Compound 2]

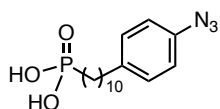

A solution of **S4** (127 mg, 0.321 mmol) and trimethylsilyl bromide (416  $\mu$ L, 3.21 mmol, 10 equiv) in dehydrated dichloromethane (5 mL) was stirred under N<sub>2</sub> atmosphere overnight at room temperature. After removal of volatiles under vacuum, MeOH (5 mL) was added, and the resulting mixture was stirred overnight at room temperature. After removal of volatiles under vacuum, 1 M HCl aq. was added. The mixture was extracted with chloroform (3 times). The

combined organic layers were dried over MgSO<sub>4</sub>, filtered, and evaporated under vacuum to give **2** as a yellow solid (100 mg, 0.296 mmol, 92% yield).

<sup>1</sup>H NMR (DMSO-*d*<sub>6</sub>, 500 MHz): δ 7.22 (d, *J* = 8.4 Hz, 2H, ArH), 7.01 (d, *J* = 8.5 Hz, 2H, ArH), 2.54 (t, *J* = 7.7 Hz, 2H, Ar-CH<sub>2</sub>-), 1.55–1.50 (m, 2H, P-CH<sub>2</sub>-), 1.48–1.39 (m, 4H, Ar-CH<sub>2</sub>-CH<sub>2</sub>- and P-CH<sub>2</sub>-CH<sub>2</sub>-), 1.29–1.22 (m, 12H, -CH<sub>2</sub>- and -O-CH<sub>2</sub>-CH<sub>3</sub>) (Fig. S31).

<sup>13</sup>C NMR (DMSO-*d*<sub>6</sub>, 126 MHz): δ 141.16, 138.35, 131.54, 120.63, 36.15, 32.67, 31.86 (d, *J* = 15.8 Hz), 30.70, 30.59, 30.56, 30.43, 30.28, 29.52 (d, *J* = 136.5 Hz), 24.57 (d, *J* = 4.7 Hz) (Fig. S32).

<sup>31</sup>P NMR (DMSO-*d*<sub>6</sub>, 202 MHz): δ 26.74 (Fig. S33).

HR-MS (APCI-MS) *m/z*: [S4-H]<sup>−</sup> calcd for C<sub>16</sub>H<sub>25</sub>N<sub>3</sub>O<sub>3</sub>P 338.1639, found 338.1649.

#### 4. Synthetic procedures of molecular probes for SEM-EDS analysis

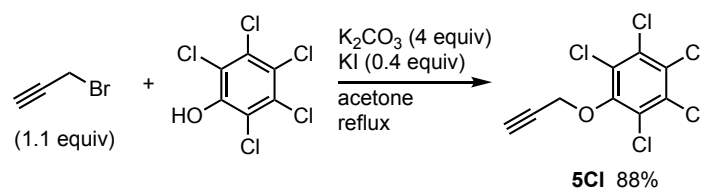

**Scheme S3** Synthetic routes to **5Cl**.

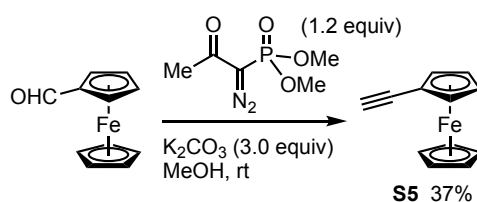

**Scheme S4** Synthetic routes to **S5**.

#### [Compound 5Cl]

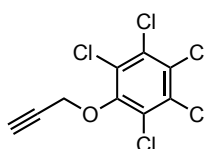

To a mixture of pentachlorophenol (1.01 g, 3.75 mmol), KI (252 mg, 1.51 mmol, 0.40 equiv) and K<sub>2</sub>CO<sub>3</sub> (2.05 g, 15.0 mmol, 4.0 equiv) in dried acetone (45 mL) was added 3-bromo-1-propyne (449  $\mu$ L, 9.2 M in toluene, 1.1 equiv). The mixture was refluxed under nitrogen atmosphere overnight. After cooling to room temperature, the crude product was purified by flash column chromatography with *n*-hexane as the eluent to give **5Cl** as a white solid (1.01 g, 3.32 mmol, 88% yield).

<sup>1</sup>H NMR (CDCl<sub>3</sub>, 500 MHz):  $\delta$  4.82 (d,  $J$  = 2.5 Hz, 2H, CH<sub>2</sub>), 2.58 (t,  $J$  = 2.5 Hz, 1H, CCH). The <sup>1</sup>H NMR spectrum was consistent with those previously reported (Fig. S34).<sup>4</sup>

### [Compound S5]

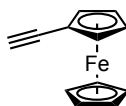

To a mixture of ferrocenecarboxaldehyde (997 mg, 4.66 mmol), K<sub>2</sub>CO<sub>3</sub> and (1.93 g, 14.0 mmol, 3.0 equiv) in dried MeOH (60 mL), dimethyl (1-diazo-2-oxopropyl)phosphonate (841  $\mu$ L, 5.61 mmol, 1.2 equiv) was added. The mixture was stirred at room temperature under nitrogen atmosphere overnight. After quenching by addition of water (~200 mL), the resulting mixture was extracted with *n*-hexane (3 times). The combined organic layer was dried over MgSO<sub>4</sub>, filtered, and evaporated under vacuum. The residue was purified by silica gel column chromatography with *n*-hexane as the eluent to give **S5** as a red oil (366 mg, 1.72 mmol, 37% yield).

<sup>1</sup>H NMR (CDCl<sub>3</sub>, 500 MHz):  $\delta$  4.46 (t,  $J$  = 1.9 Hz, 2H), 4.21 (s, 5H), 4.19 (t,  $J$  = 1.9 Hz, 2H), 2.71 (s, 1H, -CCH). The <sup>1</sup>H NMR spectrum was consistent with those previously reported (Fig. S35).<sup>5</sup>



## 5. TG analysis of organic azides

TG analysis of **1** and **2** was conducted under a dry N<sub>2</sub> flow (100 mL min<sup>-1</sup>) in the temperature range of 30–400 °C and an increasing rate of 5 K min<sup>-1</sup> for both **1** and **2** (Fig. S1).

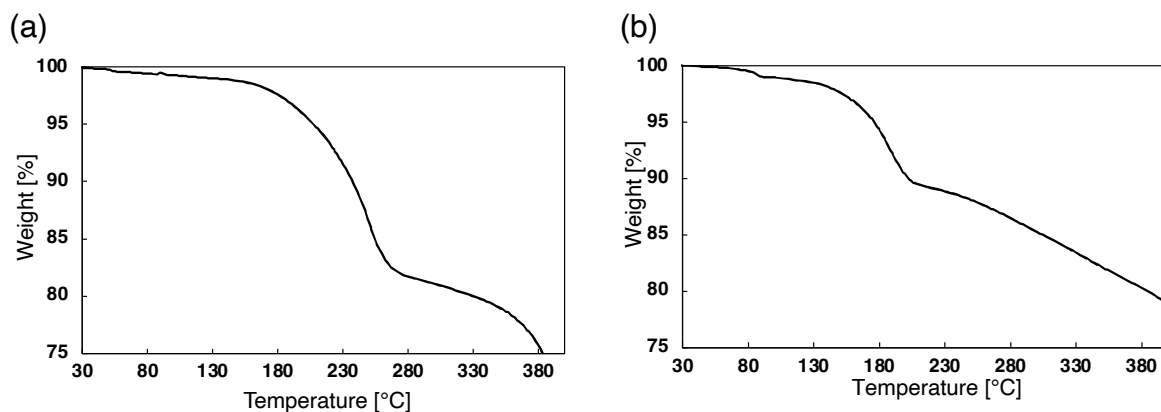

**Fig. S1** TG curve of (a) **1** and (b) **2** recorded in the temperature range 30–400 °C (increasing rate = 5 K min<sup>-1</sup> under N<sub>2</sub> in 100 mL min<sup>-1</sup> stream).

## 6. Surface Modification on ZnO nanowire arrays and characterization

**6.1. Procedure of ZnO nanowires grown on a Si substrate:** ZnO NWs on Si(100) wafers were grown using the hydrothermal method (Fig. S2a).<sup>6</sup> A solution of 0.30 M Zn(OAc)<sub>2</sub>·2H<sub>2</sub>O and 0.50 M 2-ethanolamine in dehydrated ethanol (5 mL) was heated at 60 °C for 1 h. Then, 300 µL of the solution was dropped on a UV-O<sub>3</sub> cleaned Si(100) wafer (2 cm×2 cm), to conduct spin coat (500 rpm 5 s→3000 rpm 60 s). The samples were annealed at 400 °C in the air for 1 h. Meanwhile, 5.5 mM polyethylenimine (Mw ~2,000, 50 wt.% in H<sub>2</sub>O), 25 mM hexamethylenetetramine, and 25 mM Zn(NO<sub>3</sub>)<sub>2</sub>·6H<sub>2</sub>O were dissolved sequentially in distilled water (200 mL). The pre-prepared substrate was dipped into the solution and maintained at 80 °C for 16 h. After cooling to room temperature, the samples were rinsed with distilled water. Then the as-grown ZnO NWs were annealed at 400 °C in the air for 1 h. The SEM analysis confirm that the ZnO NWs grew as hexagonal columnar structures (Fig. S2b).

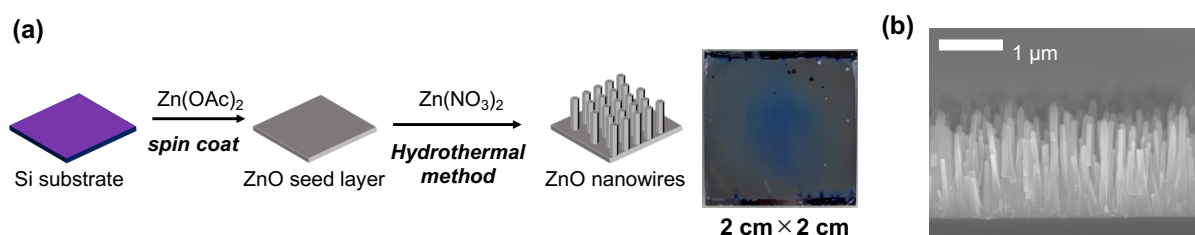

**Fig. S2** (a) Schematic procedure and photographic images of ZnO nanowire arrays. (b) The side view of the array observed by SEM analysis.

**6.2. Surface modification of ZnO nanowires:** Modification solutions (0.24  $\mu\text{M}$ ) were prepared by dissolving the azide **1** or **2** in toluene at room temperature. The ZnO nanowire array on Si wafers was dipped into the solution (10 mL) for 30 min at room temperature. Then, the samples were washed several times with toluene and dried under  $\text{N}_2$  flow. The modified ZnO nanowires are characterized by FT-IR spectroscopies (Fig. S3).

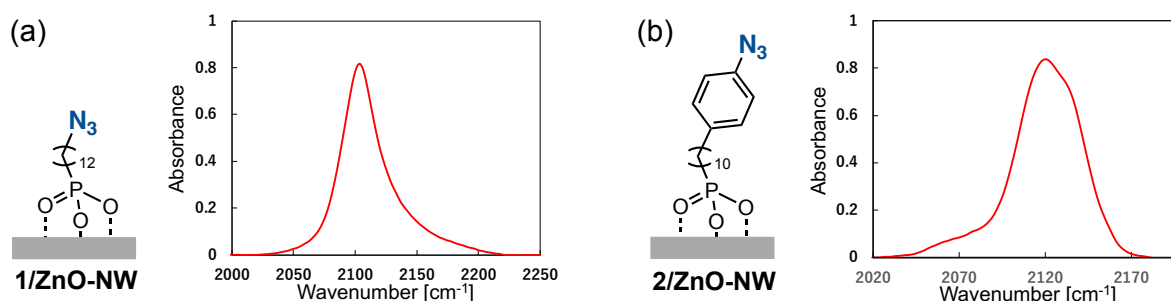

**Fig. S3** Structure and FT-IR spectra of azide region of (a) **1/ZnO-NW** and (b) **2/ZnO-NW**.

**6.3. FT-IR analysis of azido-functionalized ZnO nanowires heated on a hotplate:** To precisely control the heating temperature, **1/ZnO-NW** or **2/ZnO-NW** placed on a copper plate were covered with aluminum foil and then heated on a hotplate (Fig. S4). The heating temperature was measured using a thermocouple connected to the copper plate. The temperature difference was within 2  $^{\circ}\text{C}$ .

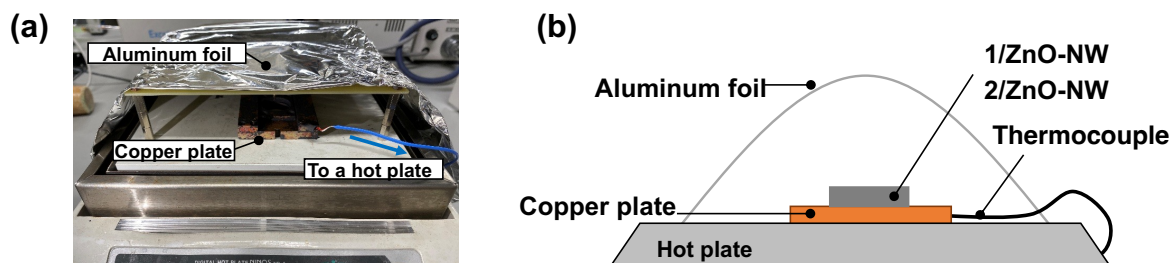

**Fig. S4** (a) Photo and (b) graphical images of the heating system using a hotplate.

The azide pyrolysis of **1/ZnO-NW** (at 200, 220, and 235  $^{\circ}\text{C}$ ) and **2/ZnO-NW** (at 150, 160, and 170  $^{\circ}\text{C}$ ) were monitored by FT-IR analysis (Fig. S5 and S6). The relationship between reaction rate constant ( $k$ ) and heating temperature ( $T$ ) is shown by the Arrhenius equation as follows (eqn. S1):

$$k = A \exp\left(-\frac{E_a}{RT}\right) \quad (\text{S1})$$

where  $E_a$  is the activation energy,  $R$  is the universal gas constant, and  $A$  is the pre-exponential coefficient. Arrhenius plot constructed from these reaction rate constants showed that the pyrolysis activation energy of the surface azido group of **1/ZnO-NW** or **2/ZnO-NW** was 147 or 155  $\text{kJ mol}^{-1}$ , respectively.

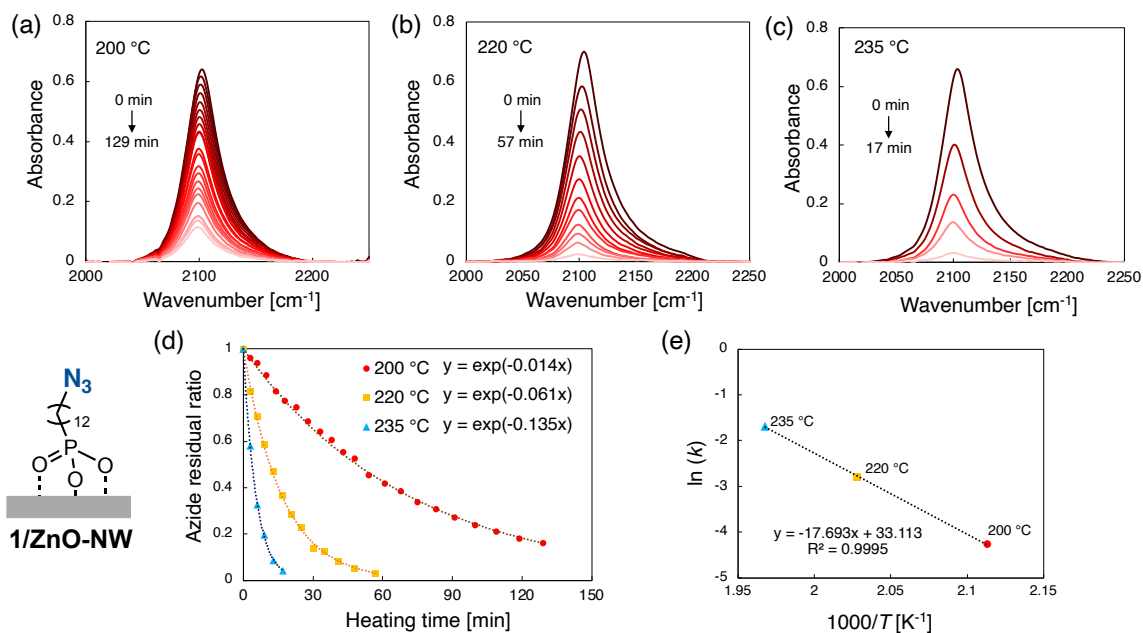

**Fig. S5** FT-IR spectral changes in the azido region on **1/ZnO-NW** uniformly heated (a) at 200 °C (heating time: 0, 3, 6, 10, 14, 18, 23, 28, 33, 38, 43, 48, 54, 61, 68, 75, 83, 91, 100, 109, 119, and 129 min), (b) at 220 °C (heating time: 0, 3, 6, 9, 13, 17, 21, 25, 30, 35, 41, 48, and 57 min), and (c) at 235 °C (heating time: 0, 3, 6, 9, 13, and 17 min). (d) Time-dependent decomposition rate of the surface azido group normalized to initial amounts (red circles for 200 °C, yellow squares for 220 °C, and blue triangles for 235 °C). (e) Arrhenius plot constructed from rate constants of the surface azide pyrolysis.

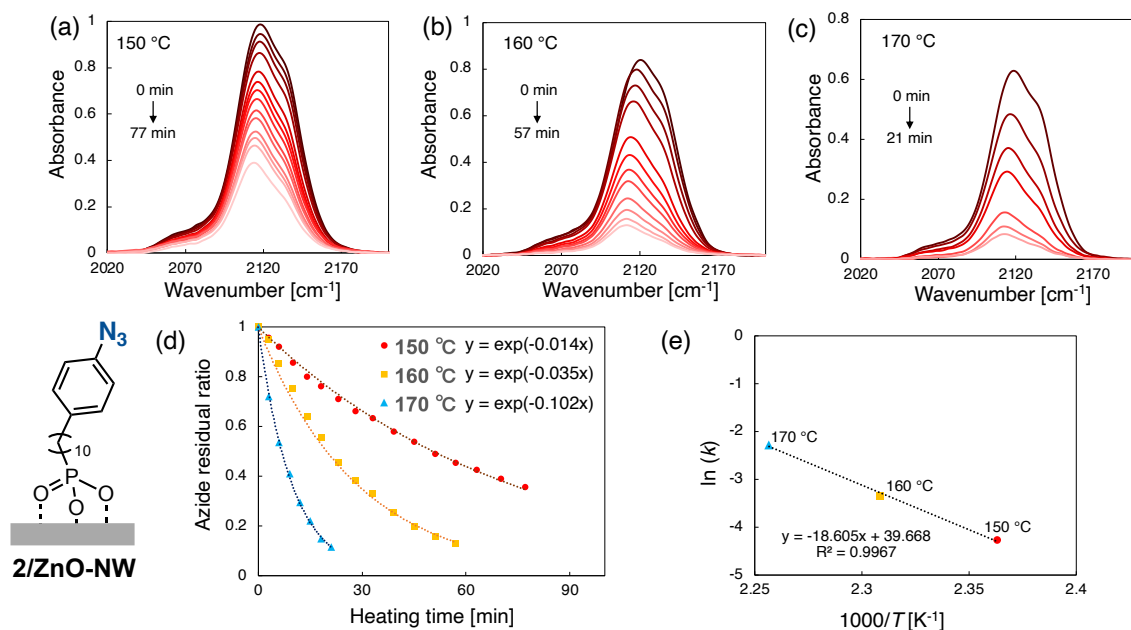

**Fig. S6** FT-IR spectral changes in the azido region on **2/ZnO-NW** uniformly heated (a) at 150 °C (heating time: 0, 3, 6, 10, 14, 18, 23, 28, 33, 39, 45, 51, 57, 63, 70, and 77 min), (b) at 160 °C (heating time: 0, 3, 6, 10, 14, 18, 23, 28, 33, 39, 45, 51, and 57 min), and (c) at 170 °C (heating time: 0, 3, 6, 9, 12, 15, 18, and 21 min). (d) Time-dependent decomposition rate of the surface azido group normalized to initial amounts (red circles for 150 °C, yellow squares for 160 °C, and blue triangles for 170 °C). (e) Arrhenius plot constructed from rate constants of the surface azide pyrolysis.

**6.4. Surface Huisgen cycloaddition on ZnO nanowires:** A reaction mixture for surface Huisgen cycloaddition was prepared by dissolving 3.0 mM each of sodium *L*-ascorbate, CuSO<sub>4</sub>, **5Cl** and 6.0 mM of tris[(1-benzyl-1*H*-1,2,3-triazol-4-yl)methyl]amine (TBTA) into 10 mL of DMSO/H<sub>2</sub>O (9:1). The modified ZnO nanowire arrays on Si wafers (**1/ZnO-NW** or **2/ZnO-NW**) were dipped into the solution at room temperature for 30 min under air. The samples were washed with DMSO and THF, and then used for SEM-EDS analysis.

**6.5. SEM-EDS analysis on ZnO nanowires:** The SEM-EDS analysis was conducted in the 3 μm × 4 μm range of the substrate (accelerating voltage 15 kV). Considering the possibility of physical adsorption of **5Cl** onto the substrate, all SEM-EDS spectra were baseline corrected using substrates in which 1-dodecylphosphonic acid-modified ZnO NWs were treated under conditions of the Huisgen cycloaddition reaction with **5Cl**. The SEM-EDS values are normalized by those of the sample obtained by the Huisgen cycloaddition reaction on the non-heated azido-modified ZnO NWs.

All SEM-EDS data analysis was performed using Python program with the Numpy and JEOL\_eds modules as follows.<sup>7,8</sup> After importing the EDS data with JEOL\_eds, the EDS spectrum for the entire field of view was obtained. The baseline of the continuous X-ray background was determined by fitting a sixth-order polynomial within the energy ranges of 1.25–1.60 keV, 2.13–2.52 keV, and 2.72–4.00 keV, followed by baseline subtraction. The integrated values within the range of 2.52–2.72 keV were used for Cl, and those within 1.93–2.13 keV were used for P.

**6.6. Molecular probes for SEM-EDS analysis:** Fig S7a shows the SEM-EDS spectrum of **5Cl-1/ZnO-NW**, which was prepared via the Huisgen cycloaddition between non-heated **1/ZnO-NW** and **5Cl**. When ethynyl ferrocene (**S5**) was used as a probe for Fe, the resulting **S5-1/ZnO-NW** afforded independent signal around 6.3 keV, but its intensity was low (Fig S7b).

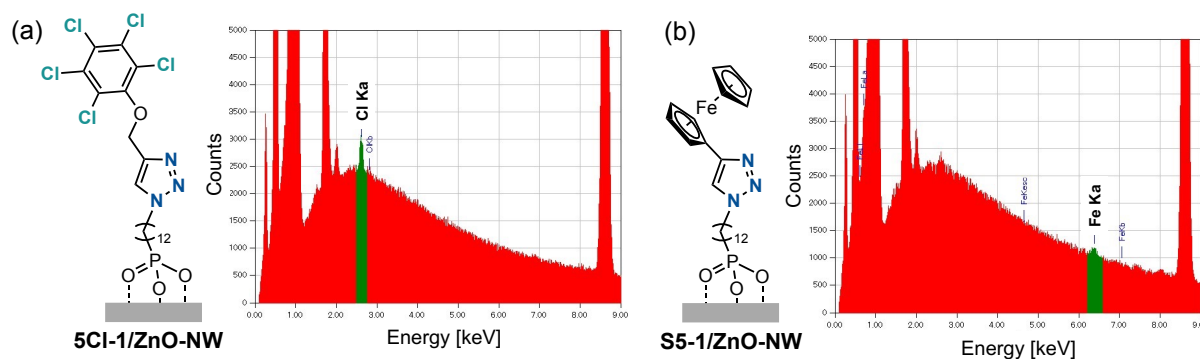

**Fig. S7** SEM-EDS spectra of (a) **5Cl-1/ZnO-NW** and (b) **S5-1/ZnO-NW**.

FT-IR spectrum of **5Cl-1/ZnO-NW** shows that 35% of the azido groups remaining unconsumed after the Huisgen cycloaddition (Fig. S8). The incomplete azido conversion is probably due to the close proximity of the surface azido group, as previously reported in literatures.<sup>9</sup> However, this did not directly affect the present thermal history analysis.

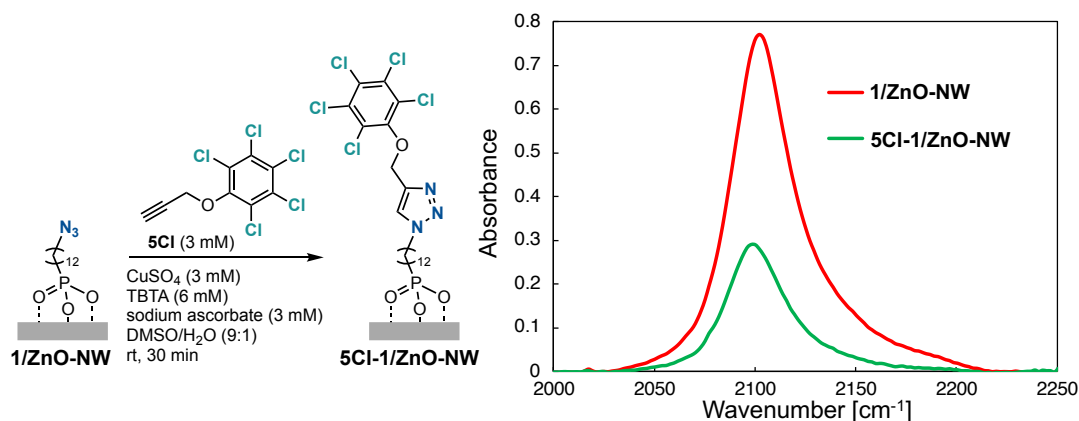

**Fig. S8** FT-IR spectra of **1/ZnO-NW** and **5Cl-1/ZnO-NW**.

**6.7. SEM-EDS spectral change depending on heating time using 1/ZnO-NW:** 1/ZnO-NW was heated at 220 °C for 0, 10, 20, 30, 40, 50, and 60 min on a hotplate. After cooling to room temperature, 5Cl was introduced to 1'/ZnO-NW via Huisgen cycloaddition using the same procedure described in Section 6.4. The resulting samples, 5Cl-1'/ZnO-NW, were used for SEM-EDS analysis (Fig. S9).

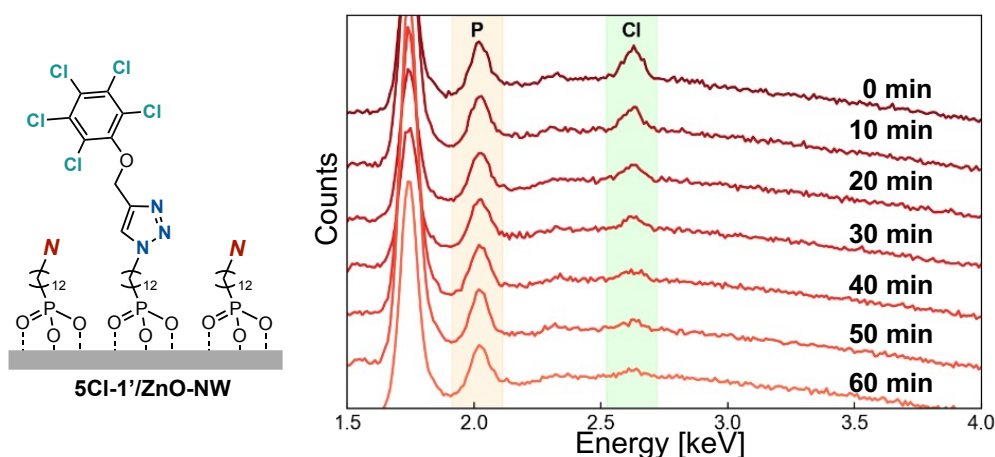

**Fig. S9** SEM-EDS spectral variation of 5Cl-1'/ZnO-NW depending on heating time (220 °C; 0, 10, 20, 30, 40, 50, and 60 min).

**6.8. SEM-EDS spectral change depending on heating temperature using 1/ZnO-NW:** 1/ZnO-NW was heated at 180, 190, 200, 210, 220, 230, 235, 240, 250, and 260 °C for 10 min with a hotplate. After cooling to room temperature, 5Cl was introduced to 1'/ZnO-NW via Huisgen cycloaddition using the same procedure described in Section 6.4. The resulting samples, 5Cl-1'/ZnO-NW, were used for SEM-EDS analysis. The relative ratio of Cl signal intensity to P signal intensity is denoted as  $Cl/P$ . The plot of the normalized values relative to the initial level at each temperature  $(Cl/P)/(Cl/P)_0$  is shown in Fig. S10.

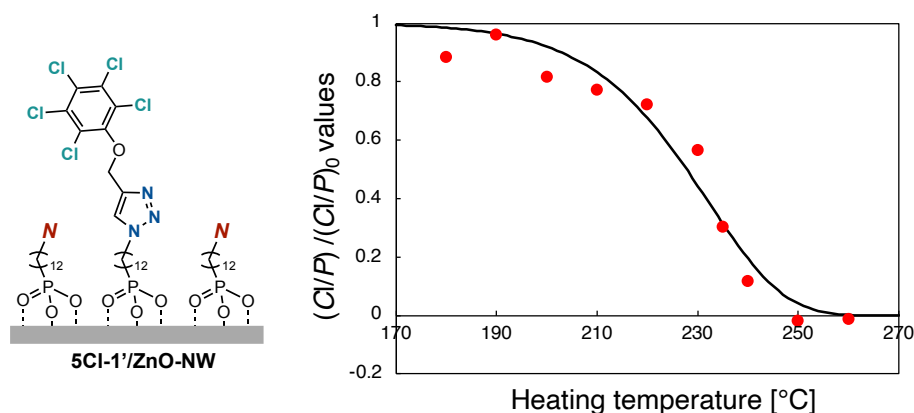

**Fig. S10** Calibration curve obtained by fitting the measured  $(Cl/P)/(Cl/P)_0$  values of 5Cl-1'/ZnO-NW, based on SEM-EDS analysis (heating temperature: 180, 190, 200, 210, 220, 230, 235, 240, 250, and 260 °C for 10 min).

**6.9. SEM-EDS spectral change depending on heating temperature using 2'/ZnO-NW:** 2'/ZnO-NW was heated at 130, 140, 150, 160, 170, 180, 190, and 200 °C for 10 min on a hotplate. After cooling to room temperature, 5Cl was introduced to 2'/ZnO-NW via Huisgen cycloaddition using the same procedure described in Section 6.4. The resulting samples, 5Cl-2'/ZnO-NW, were used for SEM-EDS analysis. The plot of the normalized values relative to the initial level at each temperature  $(Cl/P)/(Cl/P)_0$  is shown in Fig. S11.

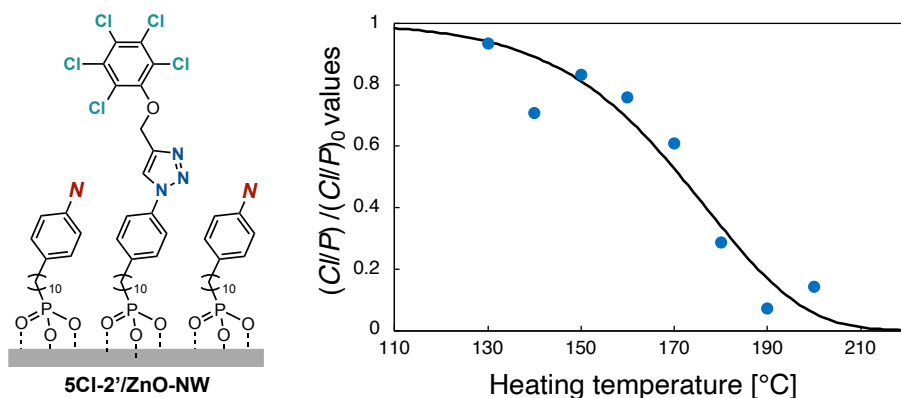

**Fig. S11** Calibration curve obtained by fitting the measured  $(Cl/P)/(Cl/P)_0$  values of 5Cl-2'/ZnO-NW, based on SEM-EDS analysis (heating temperature: 130, 140, 150, 160, 170, 180, 190, and 200 °C for 10 min).

**6.10. Preparation of calibration curve:** The normalized value relative to the initial level at each temperature,  $(Cl/P)/(Cl/P)_0$  calculated by SEM-EDS analysis is theoretically comparable to the azido-decomposition ratio  $([N_3]/[N_3]_0)$  in first-order reaction) determined by FT-IR measurements. Thus, the calibration curve shown in Fig. S11 was constructed as follows (eqn. S2):

$$\frac{(Cl/P)}{(Cl/P)_0} = \frac{(N_3)}{(N_3)_0} = \exp(-kt) = \exp\left\{-A \exp\left(-\frac{E_a}{RT}\right) \cdot t\right\} \quad (S2)$$

where  $k$  is reaction rate constant based on Arrhenius equation (eqn. S1),  $E_a$  is the activation energy,  $R$  is the universal gas constant,  $T$  is temperature,  $A$  is the pre-exponential factor, and  $t$  is the heating time (10 min). The calibration curves for 5Cl-1'/ZnO-NW and 5Cl-2'/ZnO-NW are shown in eqn. S3 and S4, respectively.

$$\frac{(Cl/P)}{(Cl/P)_0} = \exp\left\{-3.26 \times 10^{15} \exp\left(-\frac{1.81 \times 10^4}{T}\right)\right\} \quad (S3)$$



$$\frac{(Cl/P)}{(Cl/P)_0} = \exp \left\{ -1.25 \times 10^9 \exp \left( -\frac{9.60 \times 10^3}{T} \right) \right\} \quad (S4)$$

The  $(Cl/P)/(Cl/P)_0$  values were obtained through SEM-EDS measurements (three times at each temperature). The average of the three values was plotted against temperature to provide a calibration curve (Fig. S10).

The differences between the measured  $(Cl/P)/(Cl/P)_0$  values and the calibration curve at each temperature is defined as  $\Delta(Cl/P)/(Cl/P)_0$ . Assuming that  $\Delta(Cl/P)/(Cl/P)_0$  exhibits no temperature-dependence and follows a normal distribution,  $\Delta(Cl/P)/(Cl/P)_0$  has a mean of  $-0.0269$  and a standard deviation of  $0.110$ . The 90% confidence interval for  $\Delta(Cl/P)/(Cl/P)_0$  ranges from  $0.154$  on the positive side to  $0.208$  on the negative side relative to the calibration curve.

Based on the above consideration, the calibration curve was vertically shifted by the confidence interval ( $+0.154$  to  $-0.208$ ), generating two additional curves shown as gray curves in Fig. S12. We adopted the region enclosed by the two gray curves as an uncertainty range of the calibration curve for calculating the heating temperature. Representative raw data of each SEM-EDS measurement are shown in Fig. S13. All data with outliers removed according to box-and-whisker diagram are listed in Table S1–S3.

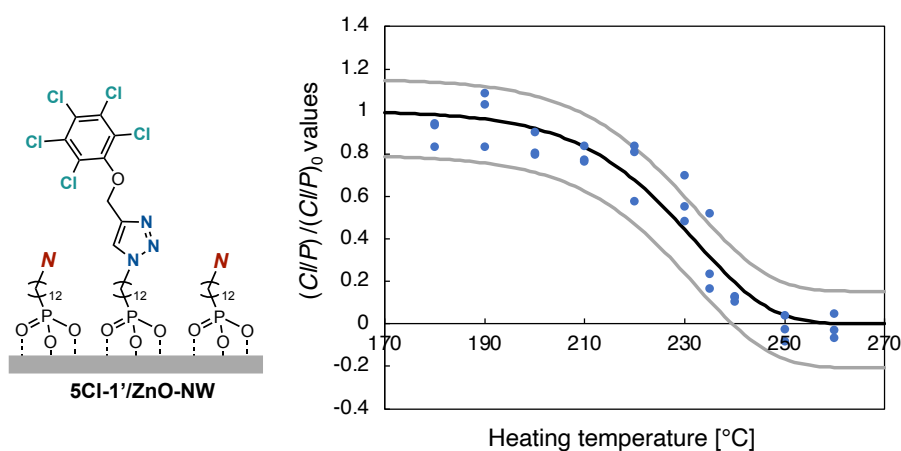

**Fig. S12** Calibration curve obtained by fitting the measured  $(Cl/P)/(Cl/P)_0$  values of **5Cl-1'/ZnO-NW** based on SEM-EDS analysis. The region enclosed by gray two curves represents the estimated uncertainty range of the calibration curve.



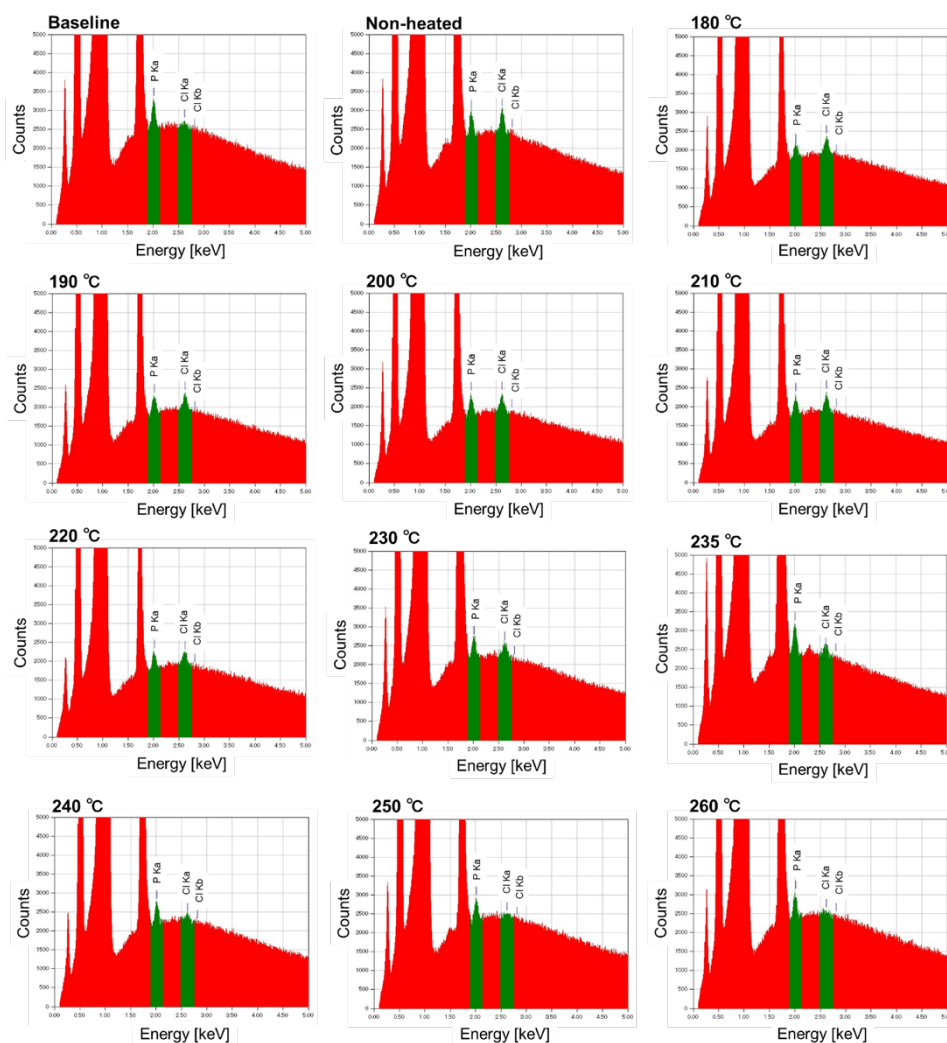

**Fig. S13** Representative raw data of SEM-EDS analysis of 1-dodecylphosphonic acid-modified ZnO NWs, non-heated 5Cl-1/ZnO-NW, and 5Cl-1'/ZnO-NW (heated at 180, 190, 200, 210, 220, 230, 235, 240, 250, and 260 °C).

**Table S1** SEM-EDS data of 1-dodecylphosphonic acid-modified ZnO NWs.

| 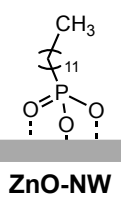 | Run     | <i>Cl</i> (intensity) | <i>P</i> (intensity) | <i>Cl/P</i> |
|-----------------------------------------------------------------------------------|---------|-----------------------|----------------------|-------------|
|                                                                                   | 1       | 1133                  | 5635                 | 0.2011      |
|                                                                                   | 2       | 1388                  | 5888                 | 0.2358      |
|                                                                                   | 3       | 1341                  | 5868                 | 0.2285      |
|                                                                                   | Average | -                     | -                    | 0.2218      |

**Table S2** SEM-EDS data of non-heated **5Cl-1/ZnO-NW**.

| 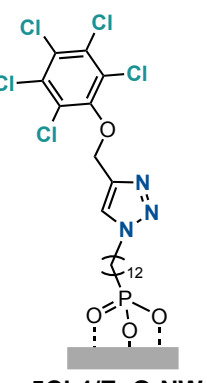 | Run     | <i>Cl</i> (intensity) | <i>P</i> (intensity) | <i>Cl/P</i> | <i>Cl/P</i> <sup>a</sup> |
|------------------------------------------------------------------------------------|---------|-----------------------|----------------------|-------------|--------------------------|
|                                                                                    | 1       | 5378                  | 4573                 | 1.176       | 0.9543                   |
|                                                                                    | 2       | 5450                  | 3755                 | 1.451       | 1.230                    |
|                                                                                    | 3       | 5365                  | 4169                 | 1.287       | 1.065                    |
|                                                                                    | 4       | 5425                  | 4136                 | 1.312       | 1.090                    |
|                                                                                    | 5       | 5635                  | 4052                 | 1.391       | 1.169                    |
|                                                                                    | 6       | 5143                  | 4384                 | 1.173       | 0.9515                   |
|                                                                                    | 7       | 6208                  | 3998                 | 1.553       | 1.331                    |
|                                                                                    | Average | -                     | -                    | -           | 1.113                    |

<sup>a</sup> Subtracted the data of 1-dodecylphosphonic acid-modified ZnO NWs.

**Table S3** SEM-EDS data of **5Cl-1'/ZnO-NW** (heated at 180, 190, 200, 210, 220, 230, 235, 240, 250, and 260 °C; measured three times at each temperature).

|                                                                                                                | Temp.<br>[°C] | Cl (intensity) | P (intensity) | Cl/P   | Cl/P <sup>a</sup> | Cl/P <sup>b</sup> |
|----------------------------------------------------------------------------------------------------------------|---------------|----------------|---------------|--------|-------------------|-------------------|
|                                                                                                                |               |                |               |        |                   |                   |
| 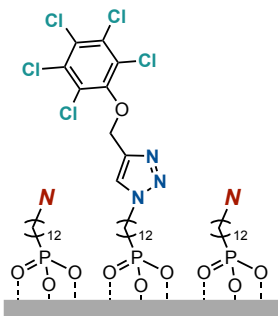 <p><b>5Cl-1'/ZnO-NW</b></p> | 180           | 4096           | 3292          | 1.244  | 1.023             | 0.9188            |
|                                                                                                                |               | 3185           | 2821          | 1.129  | 0.9071            | 0.8151            |
|                                                                                                                |               | 3862           | 3117          | 1.239  | 1.017             | 0.9140            |
|                                                                                                                | 190           | 4032           | 3000          | 1.344  | 1.122             | 1.008             |
|                                                                                                                |               | 3368           | 2990          | 1.126  | 0.9043            | 0.8126            |
|                                                                                                                |               | 3749           | 2678          | 1.400  | 1.178             | 1.059             |
|                                                                                                                | 200           | 4108           | 3786          | 1.085  | 0.8633            | 0.7757            |
|                                                                                                                |               | 4209           | 3497          | 1.204  | 0.9819            | 0.8823            |
|                                                                                                                |               | 3964           | 3616          | 1.096  | 0.8743            | 0.7856            |
|                                                                                                                | 210           | 3727           | 3544          | 1.052  | 0.8301            | 0.7458            |
|                                                                                                                |               | 5531           | 4890          | 1.131  | 0.9095            | 0.8172            |
|                                                                                                                |               | 4849           | 4563          | 1.063  | 0.8409            | 0.7555            |
|                                                                                                                | 220           | 3424           | 3029          | 1.130  | 0.9085            | 0.8163            |
|                                                                                                                |               | 4567           | 5387          | 0.8478 | 0.6260            | 0.5625            |
|                                                                                                                |               | 5015           | 4564          | 1.099  | 0.8770            | 0.7880            |
|                                                                                                                | 230           | 3924           | 4006          | 0.9797 | 0.7579            | 0.6810            |
|                                                                                                                |               | 2917           | 3545          | 0.8229 | 0.6011            | 0.5401            |
|                                                                                                                |               | 2706           | 3616          | 0.7483 | 0.5266            | 0.4731            |
|                                                                                                                | 235           | 2355           | 4936          | 0.4771 | 0.2553            | 0.2294            |
|                                                                                                                |               | 2799           | 3547          | 0.7892 | 0.5674            | 0.5098            |
|                                                                                                                |               | 2564           | 6334          | 0.4048 | 0.1831            | 0.1645            |
|                                                                                                                | 240           | 1533           | 4247          | 0.3609 | 0.1391            | 0.1250            |
|                                                                                                                |               | 1107           | 3046          | 0.3636 | 0.1418            | 0.1274            |
|                                                                                                                |               | 1089           | 3240          | 0.3359 | 0.1141            | 0.1026            |
|                                                                                                                | 250           | 914.0          | 3405          | 0.2685 | 0.0467            | 0.0419            |
|                                                                                                                |               | 693.1          | 3522          | 0.1968 | −0.0250           | −0.0225           |
|                                                                                                                |               | 562.3          | 4231          | 0.1329 | −0.0889           | −0.0799           |
|                                                                                                                | 260           | 1275           | 4631          | 0.2753 | 0.0535            | 0.0481            |
|                                                                                                                |               | 670.9          | 4351          | 0.1542 | −0.0676           | −0.0607           |
|                                                                                                                |               | 944.6          | 4935          | 0.1914 | −0.0304           | −0.0273           |

<sup>a</sup> Subtracted the data of 1-dodecylphosphonic acid-modified ZnO NWs.

<sup>b</sup> Normalized by the data from non-heated **5Cl-1'/ZnO-NW**.

With the same procedure for **5Cl-1'/ZnO-NW**,  $\Delta(Cl/P)/(Cl/P)_0$  of **5Cl-2'/ZnO-NW** has a mean of  $-0.00987$  and a standard deviation of  $0.132$ . The 90% confidence interval for  $\Delta(Cl/P)/(Cl/P)_0$  ranges from  $0.208$  on the positive side to  $0.228$  on the negative side relative to the calibration curve.

Based on the above consideration, the calibration curve was vertically shifted by the error margin ( $+0.208$  to  $-0.228$ ), generating two additional curves shown as gray curves in Fig. S14. We adopted the region enclosed by the two gray curves as an uncertainty range of the calibration curve for calculating the heating temperature. Representative raw data of each SEM-EDS measurement are shown in Fig. S15. All data with outliers removed according to box-and-whisker diagram are listed in Table S4 and S5. The values of 1-dodecylphosphonic acid-modified ZnO NWs shown in Table S1 were used for baseline correction.

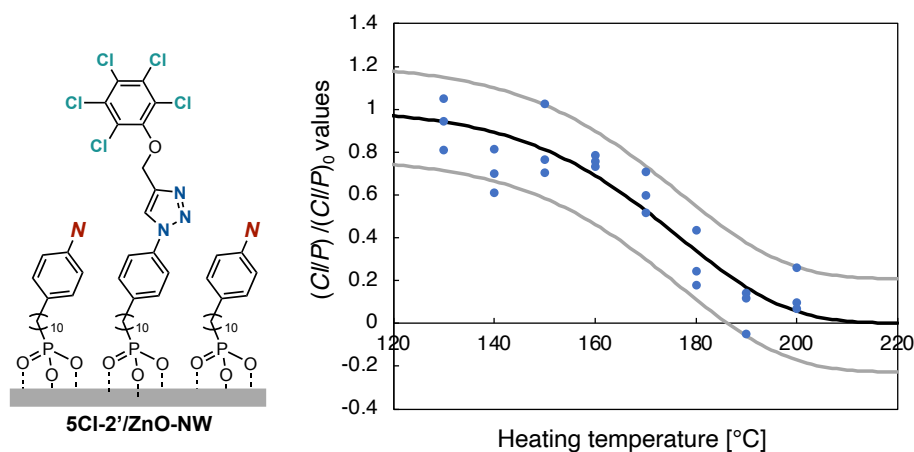

**Fig. S14** Calibration curve obtained by fitting the measured  $(Cl/P)/(Cl/P)_0$  values of **5Cl-2'/ZnO-NW** based on SEM-EDS analysis. The region enclosed by two gray curves represents the estimated uncertainty range of the calibration curve.

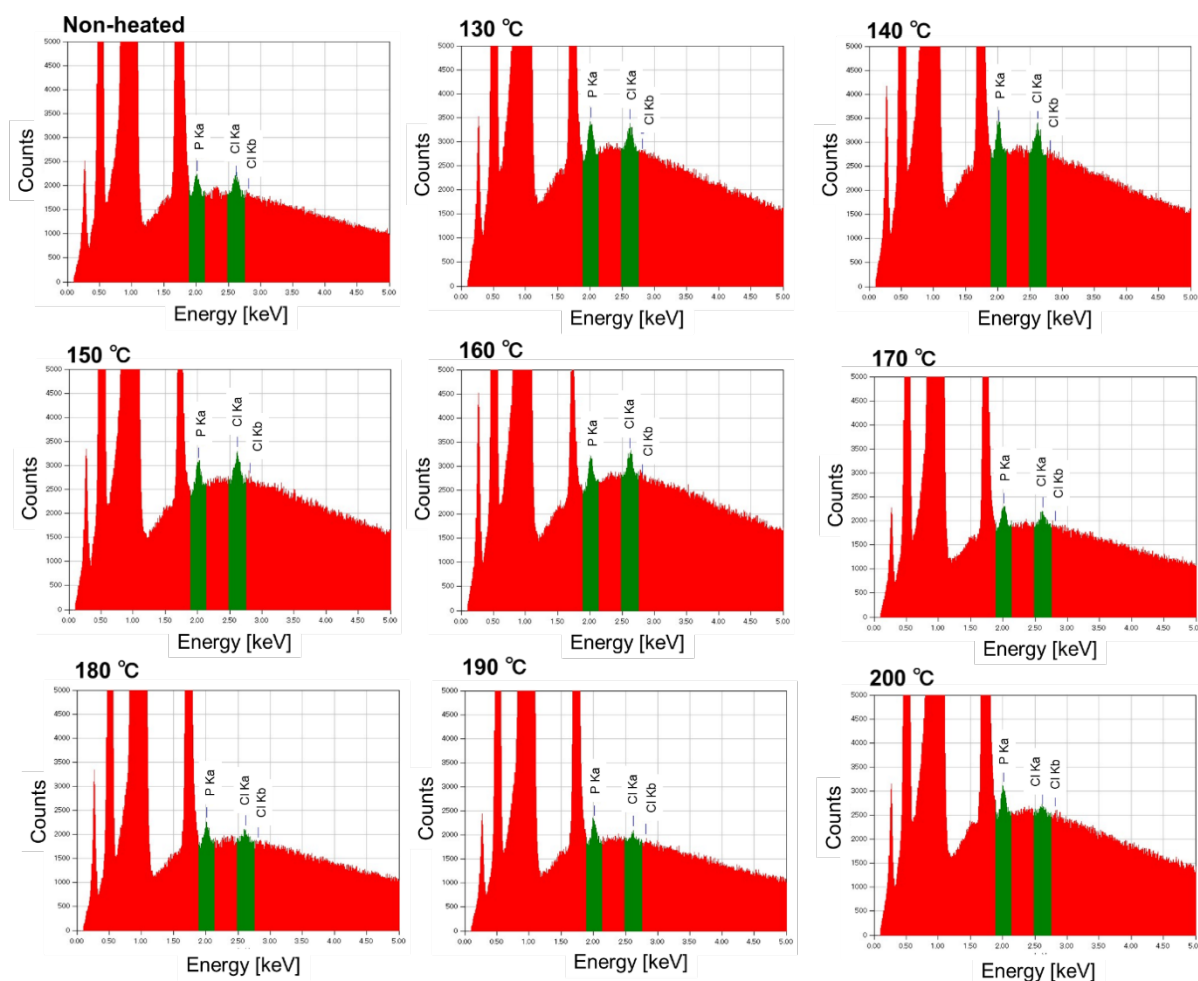

**Fig. S15** Representative raw data of SEM-EDS analysis of non-heated **5Cl-2/ZnO-NW**, and **5Cl-2'/ZnO-NW** (heated at 130, 140, 150, 160, 170, 180, 190, and 200 °C).

**Table S4** SEM-EDS data of non-heated **5Cl-2/ZnO-NW**.

| 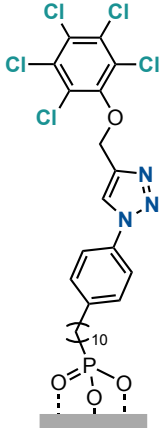<br><b>5Cl-2/ZnO-NW</b> | Run     | Cl (intensity) | P (intensity) | Cl/P   | Cl/P <sup>a</sup> |
|------------------------------------------------------------------------------------------------------------|---------|----------------|---------------|--------|-------------------|
|                                                                                                            | 1       | 3740           | 2800          | 1.336  | 1.114             |
|                                                                                                            | 2       | 3739           | 2922          | 1.280  | 1.058             |
|                                                                                                            | 3       | 4274           | 3587          | 1.191  | 0.9697            |
|                                                                                                            | 4       | 3712           | 3850          | 0.9642 | 0.7424            |
|                                                                                                            | 5       | 3610           | 2860          | 1.263  | 1.041             |
|                                                                                                            | 6       | 3904           | 3127          | 1.248  | 1.027             |
|                                                                                                            | 7       | 3549           | 3910          | 0.9077 | 0.6859            |
|                                                                                                            | 8       | 3590           | 3394          | 1.058  | 0.8360            |
|                                                                                                            | 9       | 3298           | 2757          | 1.196  | 0.9747            |
|                                                                                                            | 10      | 3636           | 3662          | 0.9930 | 0.7712            |
|                                                                                                            | Average | -              | -             | -      | 0.9219            |

<sup>a</sup> Subtracted the data of 1-dodecylphosphonic acid-modified ZnO NWs.

**Table S5** SEM-EDS data of **5Cl-2'/ZnO-NW** (heated at 130, 140, 150, 160, 170, 180, 190, and 200 °C; measured three times at each temperature).

| 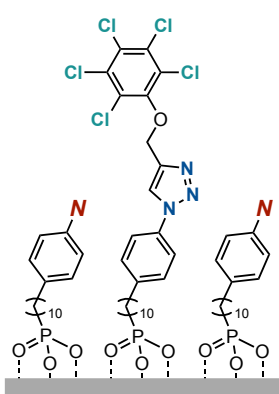<br><b>5Cl-2'/ZnO-NW</b> | Temp.<br>[°C] | <i>Cl</i> (intensity) | <i>P</i> (intensity) | <i>Cl/P</i> | <i>Cl/P</i> <sup>a</sup> | <i>Cl/P</i> <sup>b</sup> |
|------------------------------------------------------------------------------------------------------------|---------------|-----------------------|----------------------|-------------|--------------------------|--------------------------|
|                                                                                                            | 130           | 5153                  | 5307                 | 0.9710      | 0.7492                   | 0.8127                   |
|                                                                                                            |               | 5430                  | 4558                 | 1.191       | 0.9695                   | 1.052                    |
|                                                                                                            |               | 4659                  | 4264                 | 1.093       | 0.8708                   | 0.9445                   |
|                                                                                                            | 140           | 4651                  | 4785                 | 0.9719      | 0.7501                   | 0.8137                   |
|                                                                                                            |               | 4086                  | 5191                 | 0.7872      | 0.5654                   | 0.6133                   |
|                                                                                                            |               | 4525                  | 5209                 | 0.8687      | 0.6469                   | 0.7017                   |
|                                                                                                            | 150           | 4709                  | 4024                 | 1.170       | 0.9484                   | 1.029                    |
|                                                                                                            |               | 4063                  | 4662                 | 0.8715      | 0.6497                   | 0.7048                   |
|                                                                                                            |               | 4303                  | 4640                 | 0.9274      | 0.7056                   | 0.7653                   |
|                                                                                                            | 160           | 4203                  | 4555                 | 0.9226      | 0.7008                   | 0.7602                   |
|                                                                                                            |               | 4280                  | 4766                 | 0.8980      | 0.6762                   | 0.7334                   |
|                                                                                                            |               | 4047                  | 4280                 | 0.9455      | 0.7237                   | 0.7850                   |
| 170                                                                                                        | 170           | 2434                  | 3479                 | 0.6996      | 0.4778                   | 0.5183                   |
|                                                                                                            |               | 2904                  | 3751                 | 0.7741      | 0.5523                   | 0.5990                   |
|                                                                                                            |               | 2700                  | 3080                 | 0.8766      | 0.6548                   | 0.7102                   |
| 180                                                                                                        | 180           | 1936                  | 3105                 | 0.6234      | 0.4016                   | 0.4356                   |
|                                                                                                            |               | 1437                  | 3716                 | 0.3867      | 0.1649                   | 0.1789                   |
|                                                                                                            |               | 1308                  | 2917                 | 0.4483      | 0.2266                   | 0.2457                   |
| 190                                                                                                        | 190           | 1199                  | 3378                 | 0.3550      | 0.1332                   | 0.1445                   |
|                                                                                                            |               | 729                   | 4082                 | 0.1785      | −0.0433                  | −0.0470                  |
|                                                                                                            |               | 1439                  | 4358                 | 0.3303      | 0.1085                   | 0.1177                   |
| 200                                                                                                        | 200           | 1160                  | 4067                 | 0.2853      | 0.0635                   | 0.0689                   |
|                                                                                                            |               | 1846                  | 3993                 | 0.4622      | 0.2404                   | 0.2608                   |
|                                                                                                            |               | 1474                  | 4694                 | 0.3140      | 0.0922                   | 0.1000                   |

<sup>a</sup> Subtracted the data of 1-dodecylphosphonic acid-modified ZnO NWs.

<sup>b</sup> Normalized by the data from non-heated **5Cl-2'/ZnO-NW**.

**6.11. Comparison between FT-IR and SEM-EDS analysis in thermal history:** A calibration curve of azido-decomposition rate relative to heating temperature was prepared from the Arrhenius plot based on FT-IR analysis, and it was override on the calibration curve based on SEM-EDS analysis. With **1/ZnO-NW**, both curves showed good agreement, indicating that the azido-decomposition rate determined by SEM-EDS measurement was comparable to that determined directly by FT-IR measurement (Fig. S16a). In contrast, with **2/ZnO-NW**, both curves show a similar trend, but the different between the two curves was larger compared to those of **1/ZnO-NW**, especially at high temperatures (Fig. S17a). This is probably due to the aggregation of the surface aryl azide by  $\pi$ - $\pi$  interactions, which retards the Huisgen cycloaddition due to steric hindrance.<sup>10</sup> This assumption is also supported by the lower azide conversion ratio of **2/ZnO-NW** in the surface Huisgen cycloaddition, compared to that of **1/ZnO-NW** (Fig. S16b and S17b).

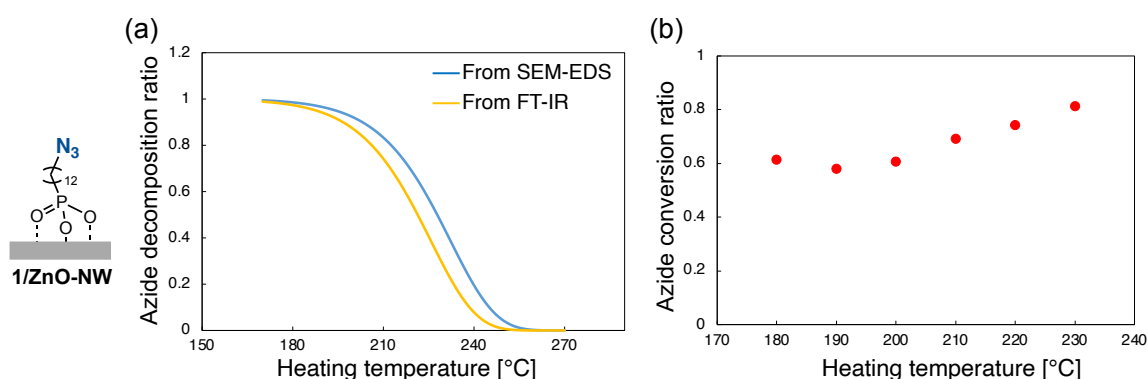

**Fig. S16** (a) Comparison of azido-decomposition ratio between FT-IR and SEM-EDS analysis for **1/ZnO-NW**. (b) Azido-conversion ratio determined by FT-IR analysis at each heating temperature for **1/ZnO-NW** (At 235, 240, 250, and 260 °C, the peak corresponding to the azido group in the FT-IR spectra were too weak for calculating the conversion ratio).

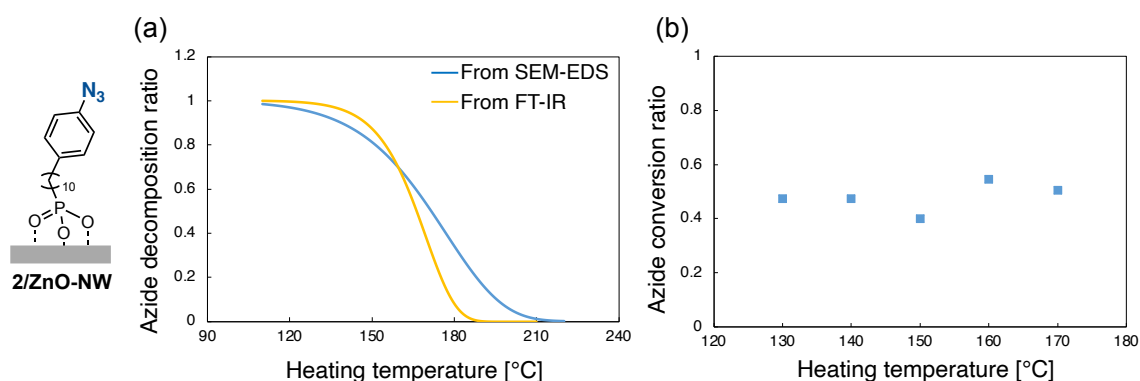

**Fig. S17** (a) Comparison of azido-decomposition ratio between FT-IR and SEM-EDS analysis for **2/ZnO-NW**. (b) Azido-conversion ratio determined by FT-IR analysis at each heating temperature for **2/ZnO-NW** (At 180, 190, and 200 °C, the peak corresponding to the azido group in the FT-IR spectra were too weak for calculating the conversion ratio).

**6.12. Fabrication of 1/ZnO-NW/Pt:** Fig. S18 shows schematic procedure of **ZnO-NW/Pt**. Photoresist LOR3B and AZP1350 were employed to fabricate the microheater with lithography technology. Spin coating of LOR3B was performed on surface oxide Si substrates at 500 rpm for 5 seconds followed by 2500 rpm for 45 seconds. Thermal baking procedure was performed at 190 °C for 5 min. Subsequently, spin coating of AZP1350 was performed on surface oxide Si substrates at 500 rpm for 5 seconds followed by 2000 rpm for 60 seconds. Thermal baking procedure was performed at 100 °C for 140 s, and then the patterning process was carried out using a photolithography machine (Heidelberg Instruments  $\mu$ PG 101 UOW1) at an energy of 40 mW. Then, to enhance the adhesion between a  $\text{SiO}_2$  substrate and Pt, a Ti thin layer was deposited on the patterned substrate by RF sputtering at a power of 100 W and an Ar pressure of 0.3 Pa with the thickness of  $\sim 3$  nm. Subsequently, Pt was deposited on the substrates with the thickness of 200 nm (RF at 50 W). A lift-off process was performed using DMF. Pt square areas were protected with carbon tape to avoid being covered with ZnO NWs. A Ti thin layer was deposited on the substrates with the thickness of  $\sim 20$  nm (RF at 100 W) to enhance the adhesion between the substrate and ZnO. Subsequently, ZnO was deposited on the substrates with the thickness of  $\sim 6$  nm (RF at 50 W) as a seed layer. ZnO NWs were grown using the hydrothermal method.<sup>6</sup> 5.5 mM Polyethylenimine (Mw  $\sim 2,000$ , 50 wt.% in  $\text{H}_2\text{O}$ ), 25 mM hexamethylenetetramine, and 25 mM  $\text{Zn}(\text{NO}_3)_2 \cdot 6\text{H}_2\text{O}$  were dissolved sequentially in distilled water (200 mL). The pre-prepared substrate was dipped into the solution and maintained at 80 °C for 16 h. After growth, the carbon-tape mask was removed, and the samples were rinsed with distilled water. Then the as-grown ZnO NWs were annealed at 400 °C in the air for 1 h to give **ZnO-NW/Pt**. The azide-modified **1/ZnO-NW/Pt** was prepared from **1** and **ZnO-NW/Pt** using the same procedure described in Section 6.2.

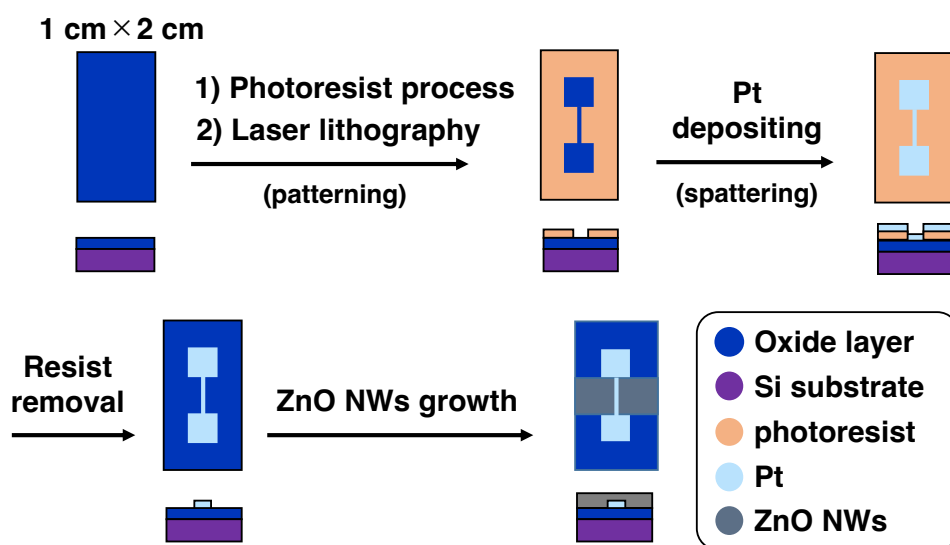

**Fig. S18** Preparation procedure of **ZnO-NW/Pt**.



**6.13. Local Joule heating of 1/ZnO-NW/Pt:** The square Pt area of 1/ZnO-NW/Pt was connected to a power supply using silver paste (Fig. S19a). A voltage of 80 V was applied for 10 min for Joule heating with 1/ZnO-NW/Pt (Fig. S19b). After cooling to room temperature, 5Cl was introduced via Huisgen cycloaddition using the same procedure described in Section 6.4., excepting for washing with DMSO only to prevent the silver paste from dissolving out. The resulting 5Cl-1'/ZnO-NW/Pt was analyzed by SEM-EDS measurement in  $3\ \mu\text{m} \times 4\ \mu\text{m}$  range from the edge of Pt heating site (Fig. S19c). Since all experiments were conducted on a single substrate, the Cl intensity relative to that of the initial value (denoted as  $Cl/Cl_0$ ) was directly used without normalization with the P value derived from the phosphonic acid anchor. Each measurement was conducted at distance of 30, 60, 90, 180, 270, 360, 450, 540, and 720  $\mu\text{m}$  from the edge of Pt heating site (Fig. S20a). The temperature distribution was calculated with the calibration curve obtained in eqn. S3, and its uncertainty was quantified based on the uncertainty range shown in Fig. S12 (Fig. S20b). Raw data of each measurement are shown in Fig. S21. All data are listed in Table S6–S8.

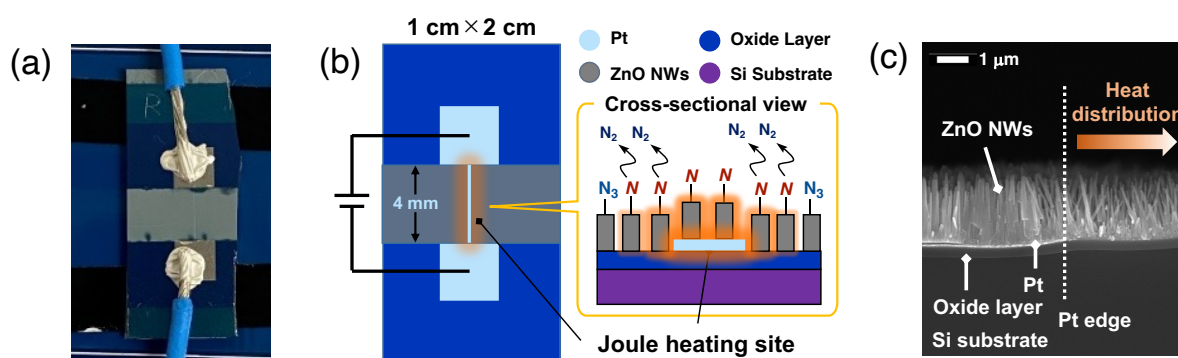

**Fig. S19** (a) Photograph and (b) Schematic of 1/ZnO-NW/Pt. The Pt heating site has dimensions of 4 mm length  $\times$  10  $\mu\text{m}$  width  $\times$  200 nm depth. (c) Cross-sectional SEM image of ZnO-NW/Pt before SAM preparation with 1. Heat distribution was measured from the Pt edge.

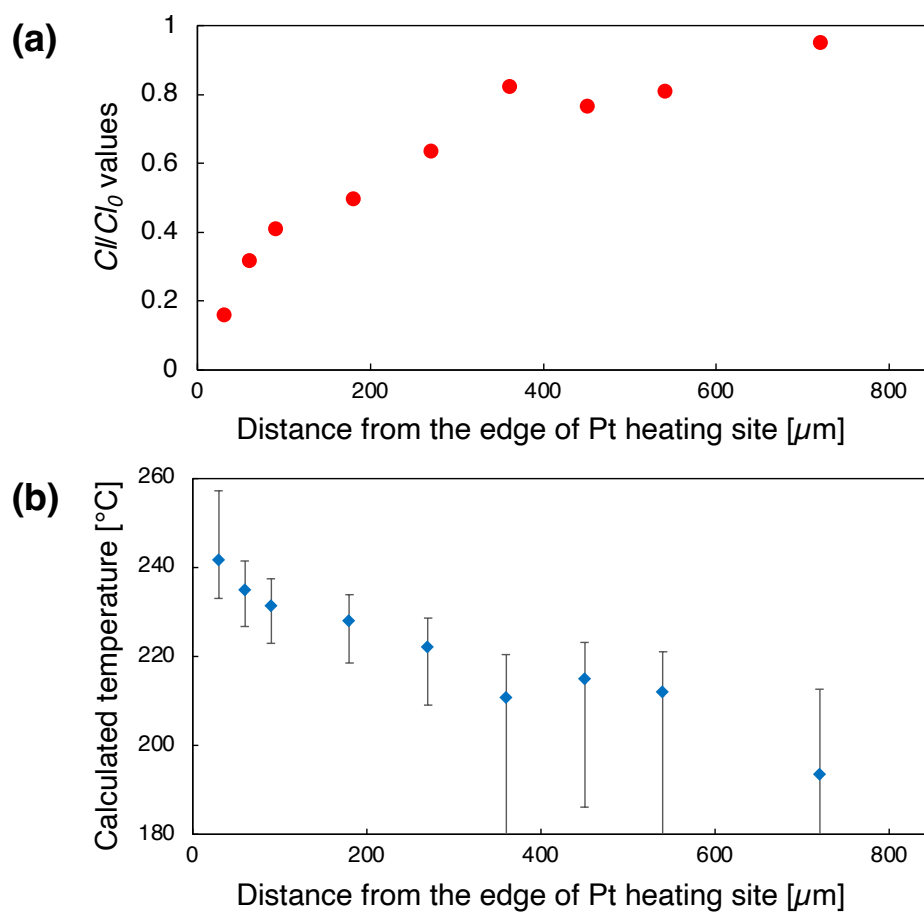

**Fig. S20** (a) EDS signal intensity and (b) temperature plotted as a function of distance from the edge of Pt heating site in **5Cl-1'/ZnO-NW/Pt** (distance: 30, 60, 90, 180, 270, 360, 450, 540, and 720  $\mu\text{m}$ ).

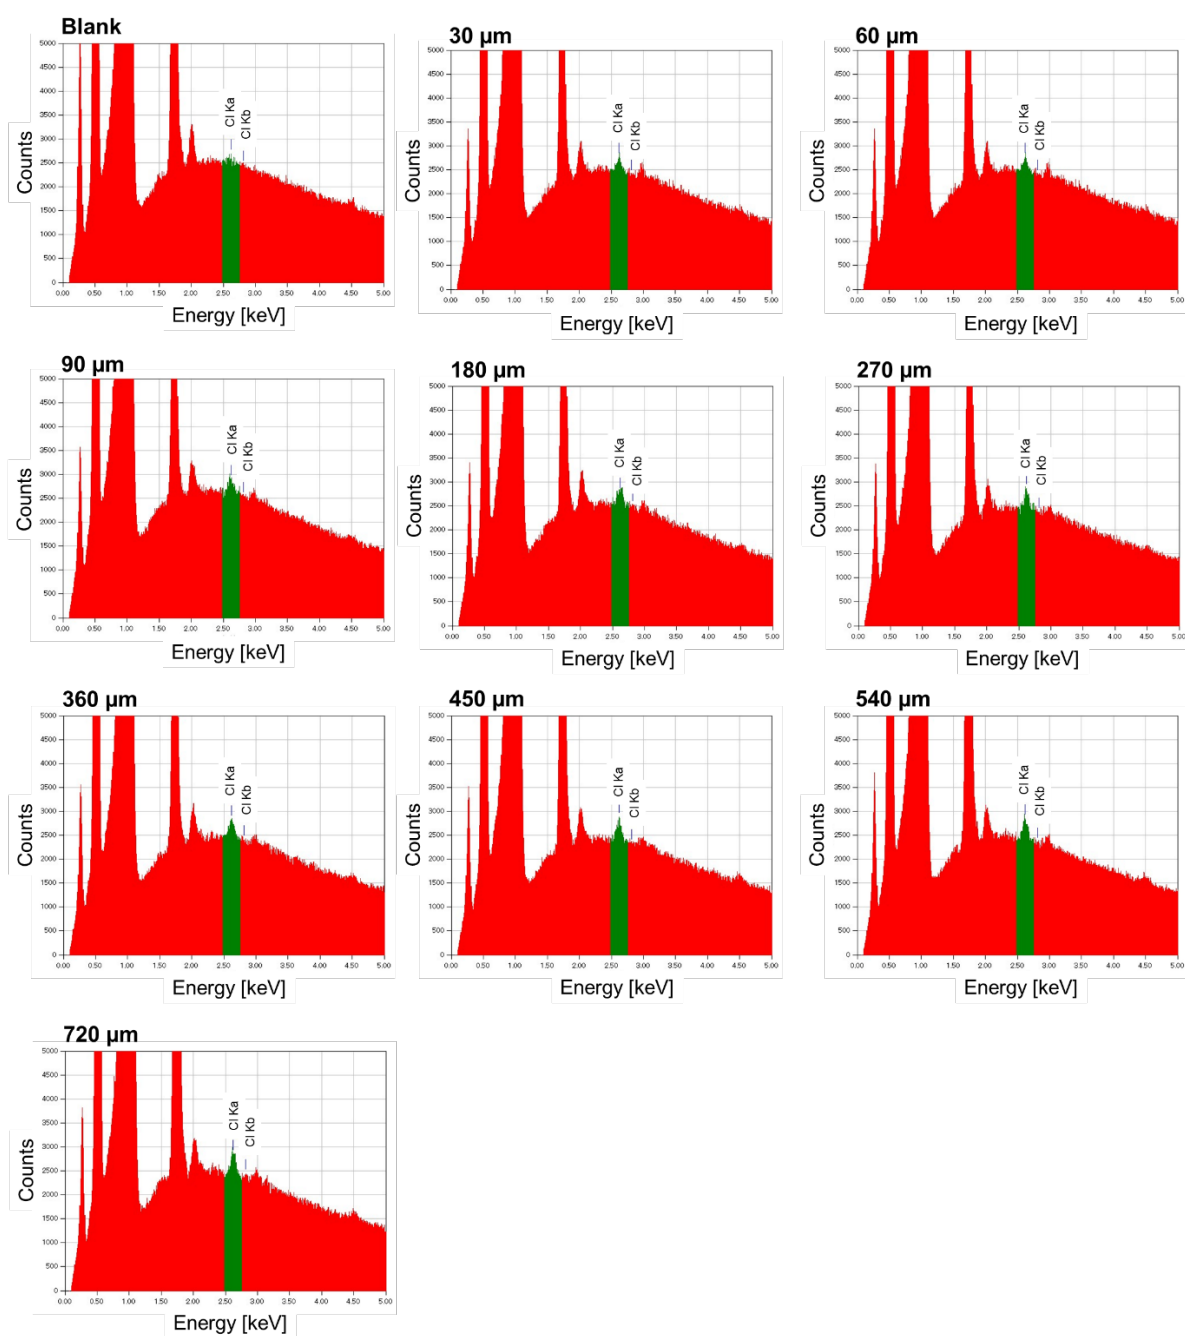

**Fig. S21** Raw data of SEM-EDS analysis of 1-dodecylphosphonic acid-modified **ZnO-NW/Pt**, non-heated **5Cl-1/ZnO-NW/Pt**, and **5Cl-1'/ZnO-NW/Pt** (at distance of 30, 60, 90, 180, 270, 360, 450, 540, and 720  $\mu\text{m}$  from the edge of Pt heating site).

**Table S6** SEM-EDS data of 1-dodecylphosphonic acid-modified **ZnO-NW/Pt**.

| 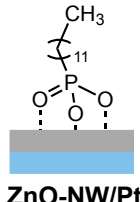<br><b>ZnO-NW/Pt</b> | Run     | <i>Cl</i> (intensity) |
|-------------------------------------------------------------------------------------------------------|---------|-----------------------|
|                                                                                                       | 1       | 1061                  |
|                                                                                                       | 2       | 1183                  |
|                                                                                                       | 3       | 798                   |
|                                                                                                       | 4       | 1331                  |
|                                                                                                       | Average | 1093                  |

**Table S7** SEM-EDS data of non-heated **5Cl-1/ZnO-NW/Pt**.

| 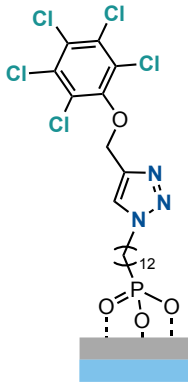<br><b>5Cl-1/ZnO-NW/Pt</b> | Run     | <i>Cl</i> (intensity) | <i>Cl</i> (intensity) <sup>a</sup> |
|--------------------------------------------------------------------------------------------------------------|---------|-----------------------|------------------------------------|
|                                                                                                              | 1       | 3550                  | 2457                               |
|                                                                                                              | 2       | 4339                  | 3246                               |
|                                                                                                              | Average | -                     | 2851                               |

<sup>a</sup> Subtracted the data of 1-dodecylphosphonic acid-modified **ZnO-NW/Pt**.

**Table S8** SEM-EDS data of **5Cl-1'/ZnO-NW/Pt** from the edge of Pt heating site.

| 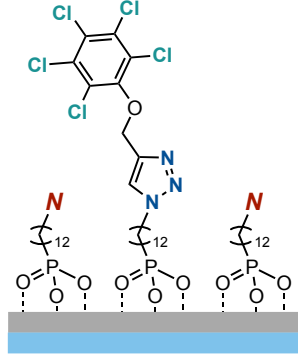<br><b>5Cl-1'/ZnO-NW/Pt</b> | Distance<br>[μm] | <i>Cl</i> (intensity) | <i>Cl</i> (intensity) <sup>a</sup> | <i>Cl/Cl<sub>0</sub></i> (intensity) <sup>b</sup> |
|----------------------------------------------------------------------------------------------------------------|------------------|-----------------------|------------------------------------|---------------------------------------------------|
|                                                                                                                | 30               | 1549                  | 456                                | 0.160                                             |
|                                                                                                                | 60               | 2001                  | 908                                | 0.318                                             |
|                                                                                                                | 90               | 2260                  | 1167                               | 0.4094                                            |
|                                                                                                                | 180              | 2509                  | 1417                               | 0.4968                                            |
|                                                                                                                | 270              | 2904                  | 1811                               | 0.6353                                            |
|                                                                                                                | 360              | 3439                  | 2346                               | 0.8228                                            |
|                                                                                                                | 450              | 3278                  | 2185                               | 0.7662                                            |
|                                                                                                                | 540              | 3399                  | 2307                               | 0.8089                                            |
|                                                                                                                | 720              | 3810                  | 2717                               | 0.9528                                            |

<sup>a</sup> Subtracted the data of 1-dodecylphosphonic acid-modified **ZnO-NW/Pt**.

<sup>b</sup> Normalized by the data from non-heated **5Cl-1/ZnO-NW/Pt**.

## 7. NMR Data

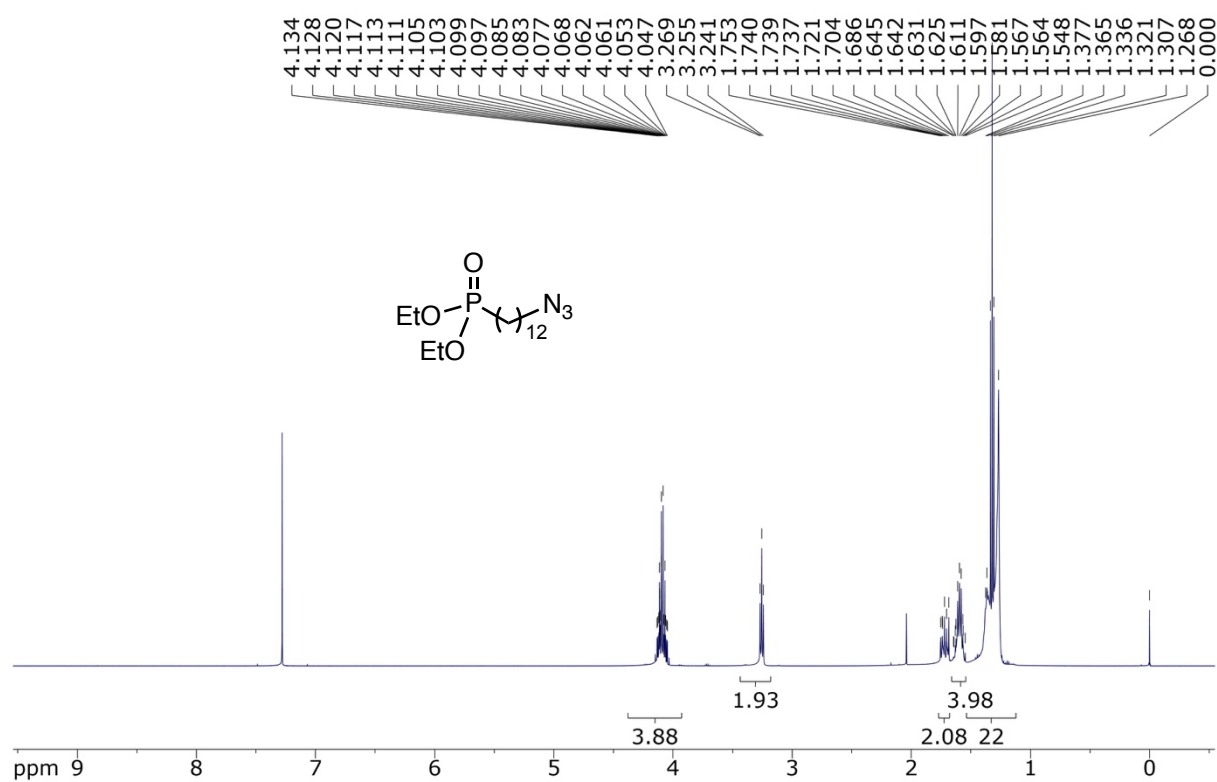

**Fig. S22** <sup>1</sup>H NMR spectrum of compound **S1** (500 MHz, CDCl<sub>3</sub>, r.t.).

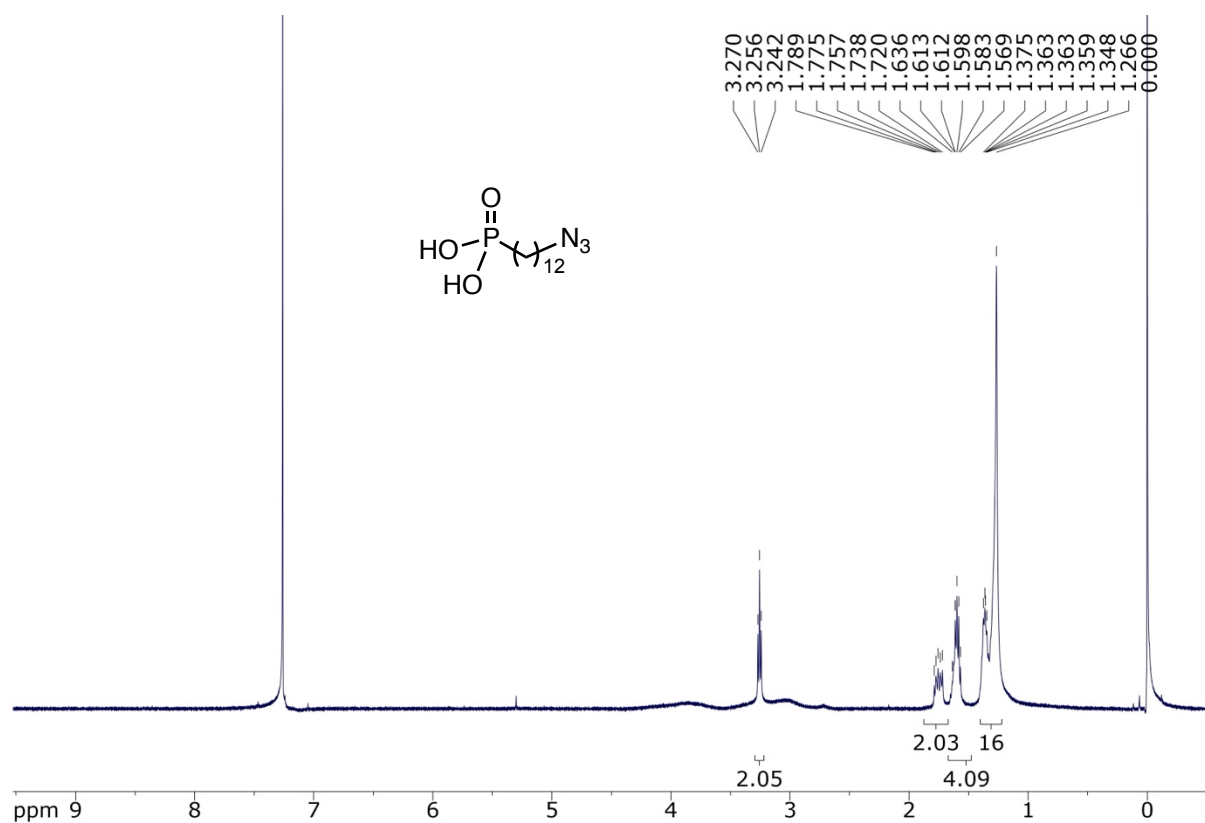

**Fig. S23** <sup>1</sup>H NMR spectrum of compound **1** (500 MHz, CDCl<sub>3</sub>, r.t.).

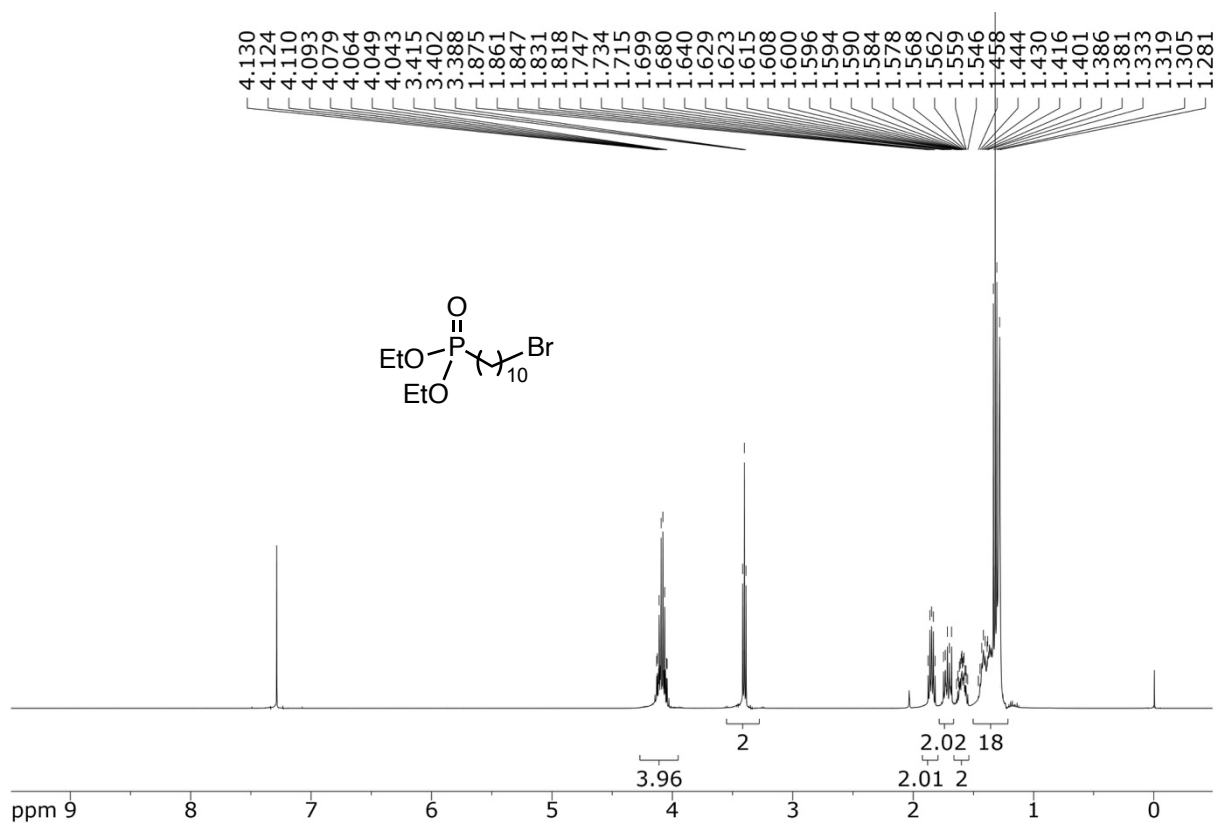

**Fig. S24** <sup>1</sup>H NMR spectrum of compound S2 (500 MHz, CDCl<sub>3</sub>, r.t.).

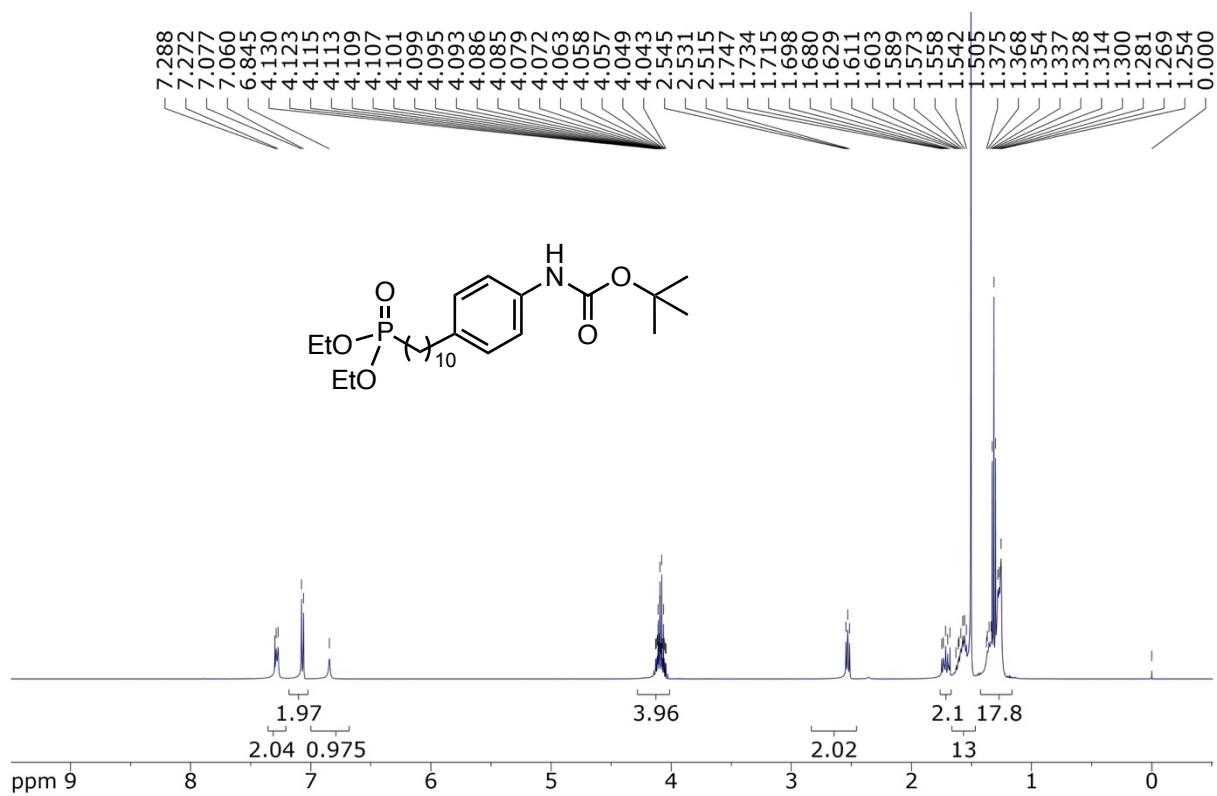

**Fig. S25** <sup>1</sup>H NMR spectrum of compound S3 (500 MHz, CDCl<sub>3</sub>, r.t.).

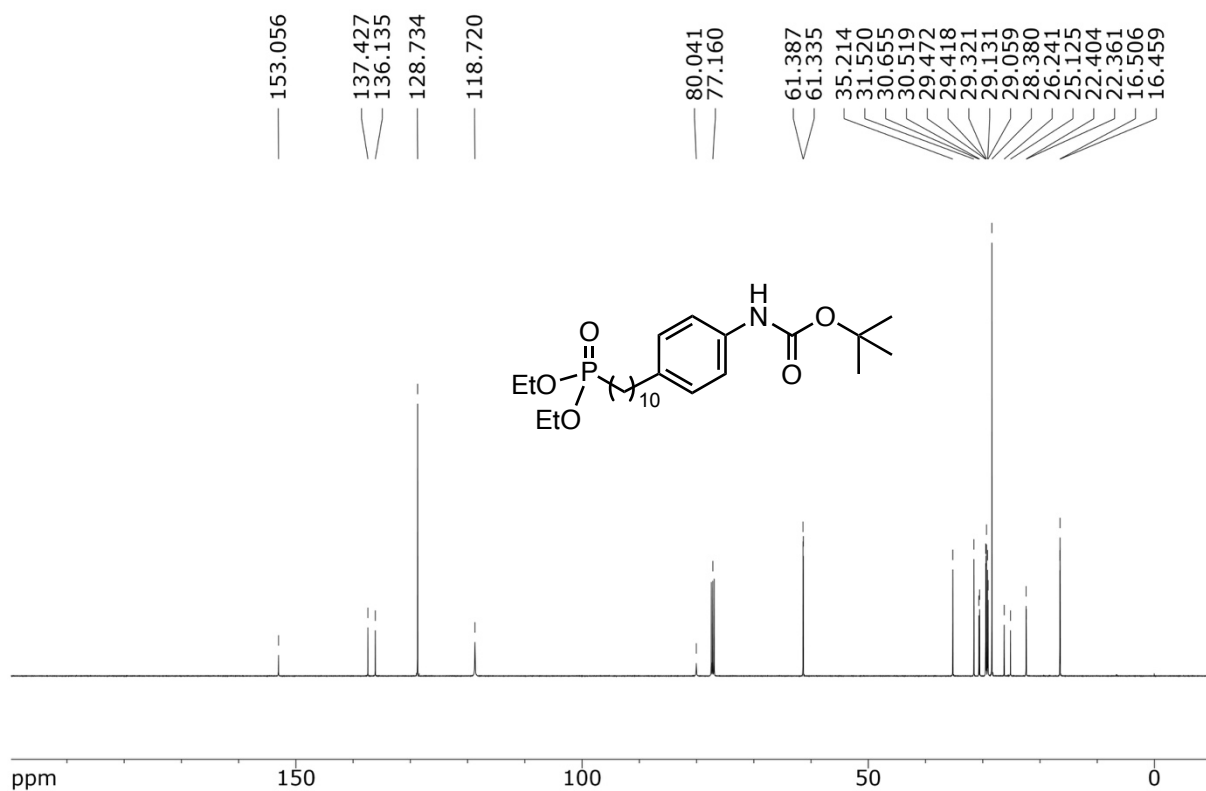

**Fig. S26** <sup>13</sup>C NMR spectrum of compound **S3** (126 MHz, CDCl<sub>3</sub>, r.t.).

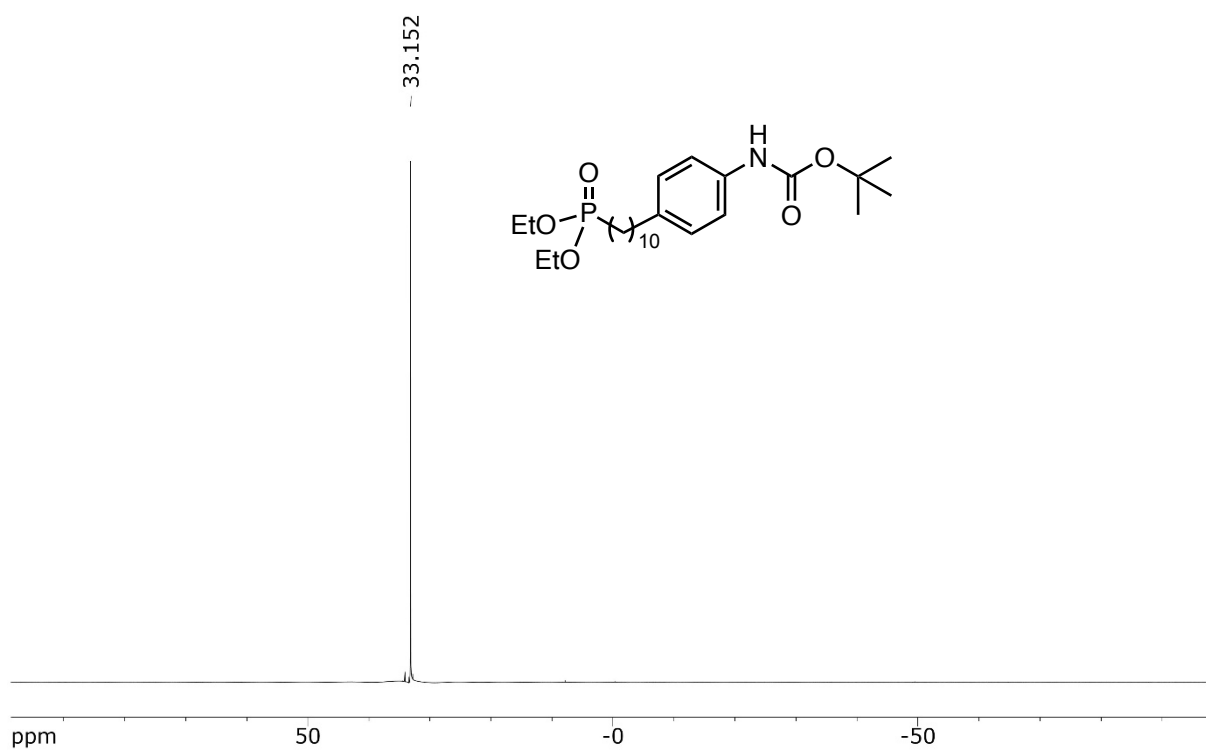

**Fig. S27** <sup>31</sup>P NMR spectrum of compound **S3** (202 MHz, CDCl<sub>3</sub>, r.t.).

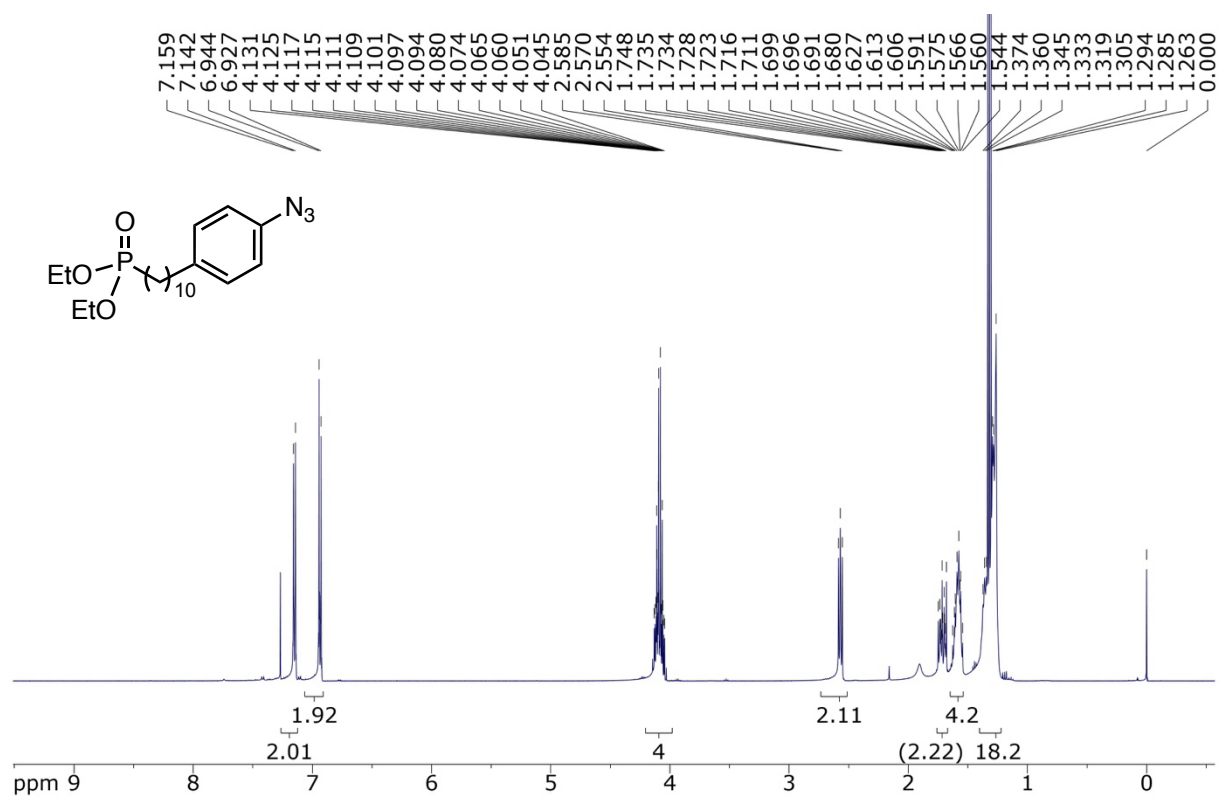

**Fig. S28** <sup>1</sup>H NMR spectrum of compound **S4** (500 MHz, CDCl<sub>3</sub>, r.t.).

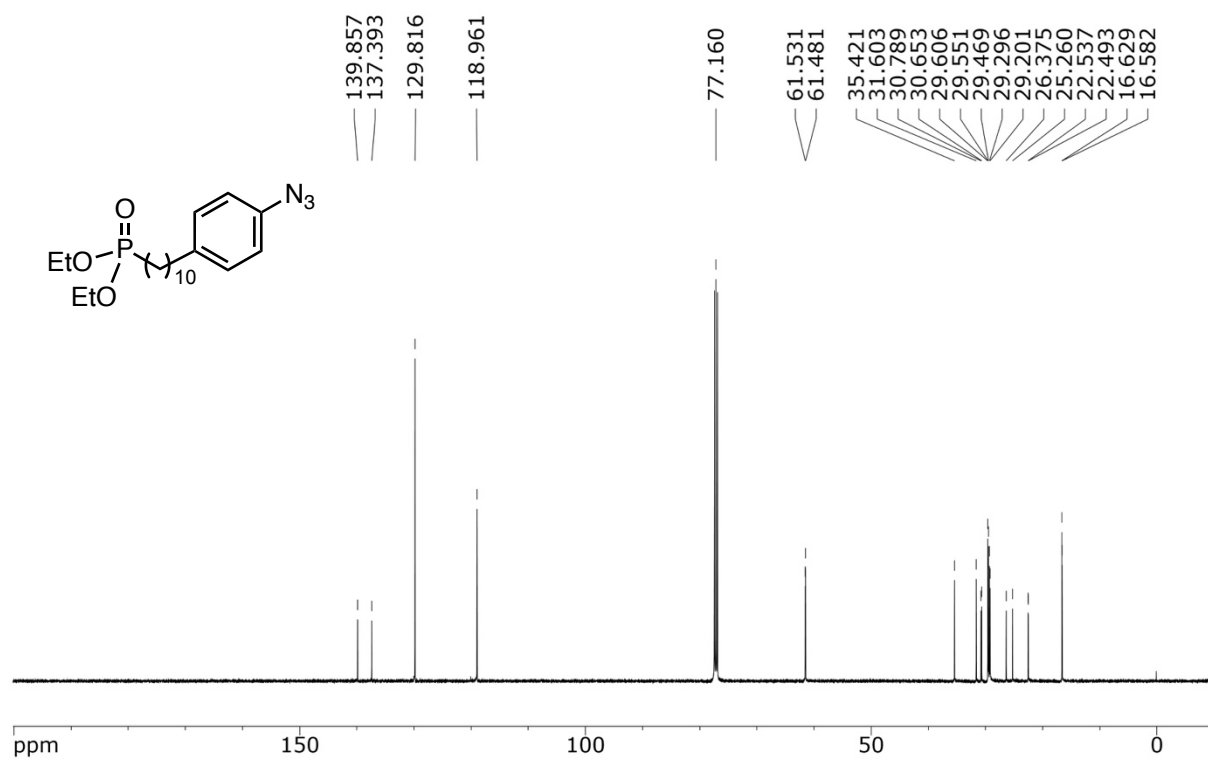

**Fig. S29** <sup>13</sup>C NMR spectrum of compound **S4** (126 MHz, CDCl<sub>3</sub>, r.t.).



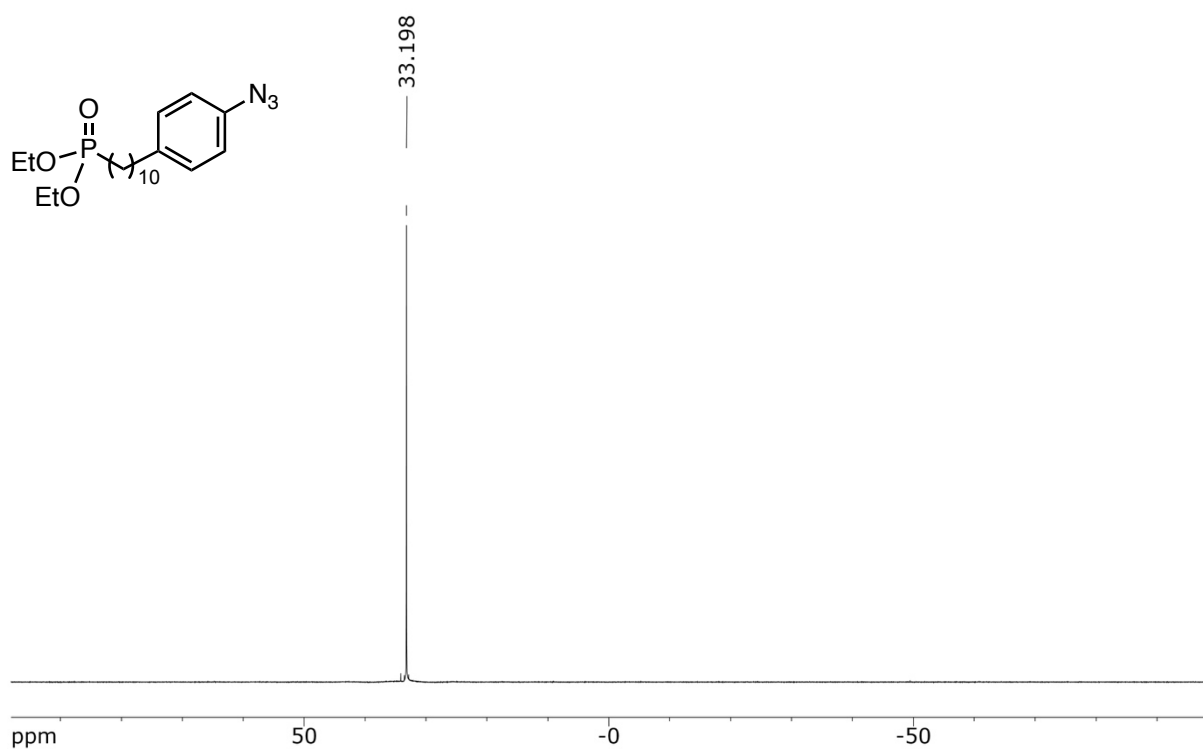

**Fig. S30** <sup>31</sup>P NMR spectrum of compound **S4** (202 MHz, CDCl<sub>3</sub>, r.t.).

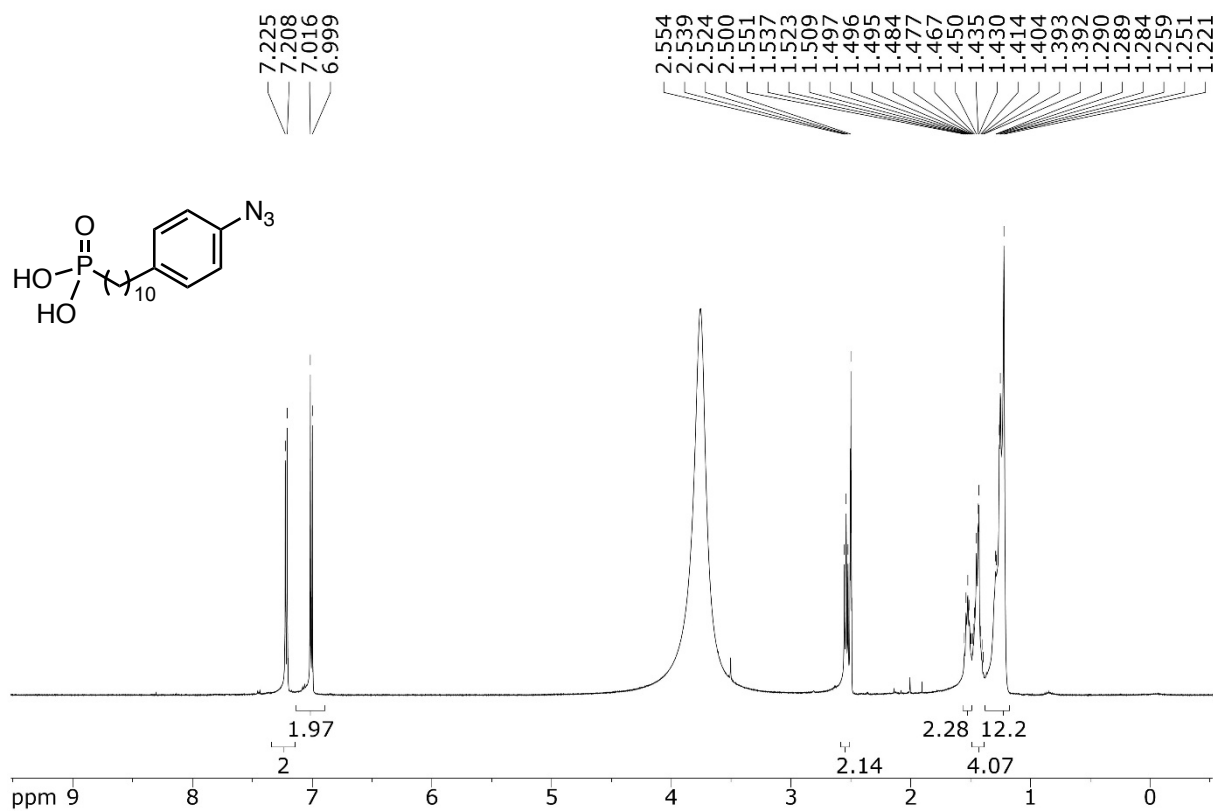

**Fig. S31** <sup>1</sup>H NMR spectrum of compound **2** (500 MHz, DMSO-*d*<sub>6</sub>, r.t.).

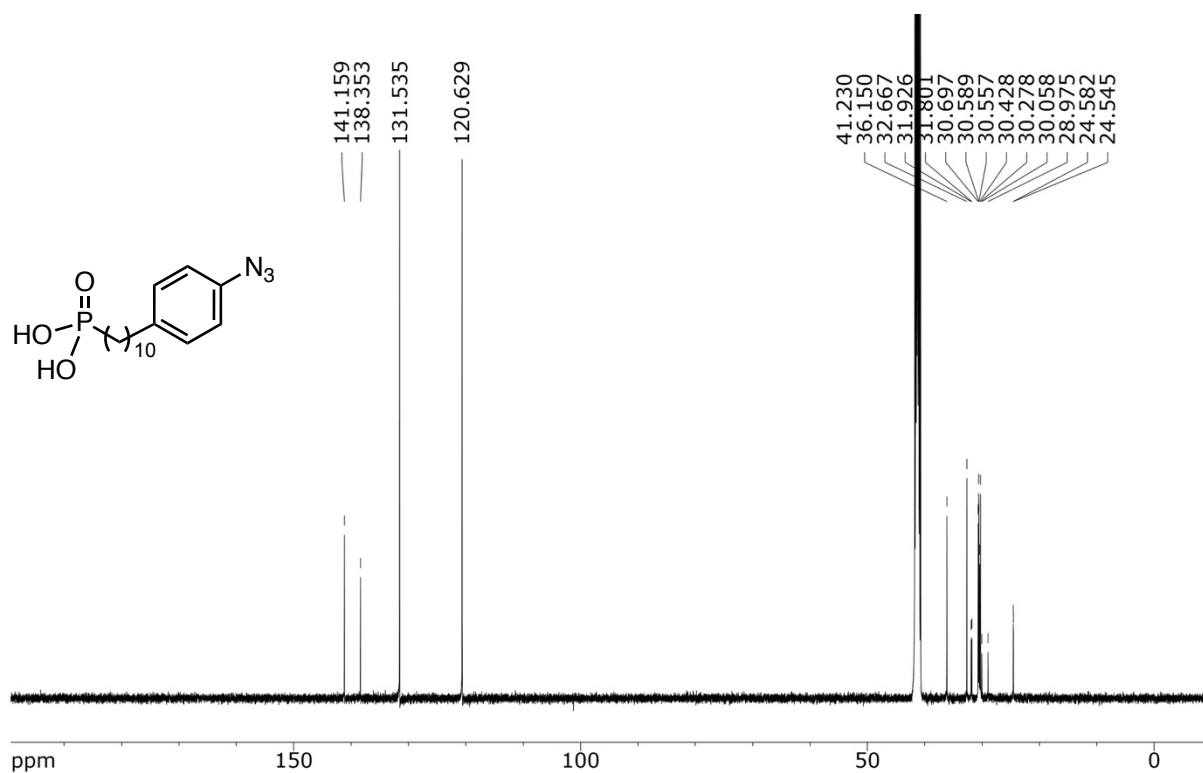

**Fig. S32** <sup>13</sup>C NMR spectrum of compound **2** (126 MHz, DMSO-*d*<sub>6</sub>, r.t.).

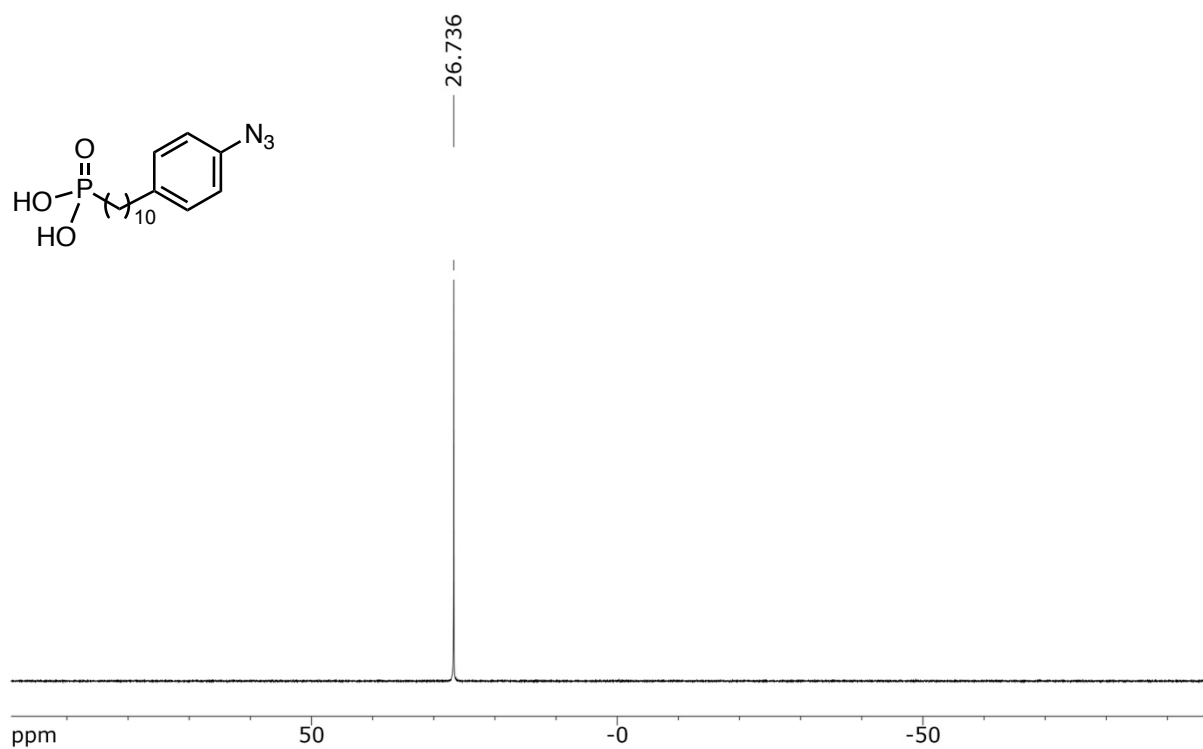

**Fig. S33** <sup>31</sup>P NMR spectrum of compound **2** (202 MHz, DMSO-*d*<sub>6</sub>, r.t.).

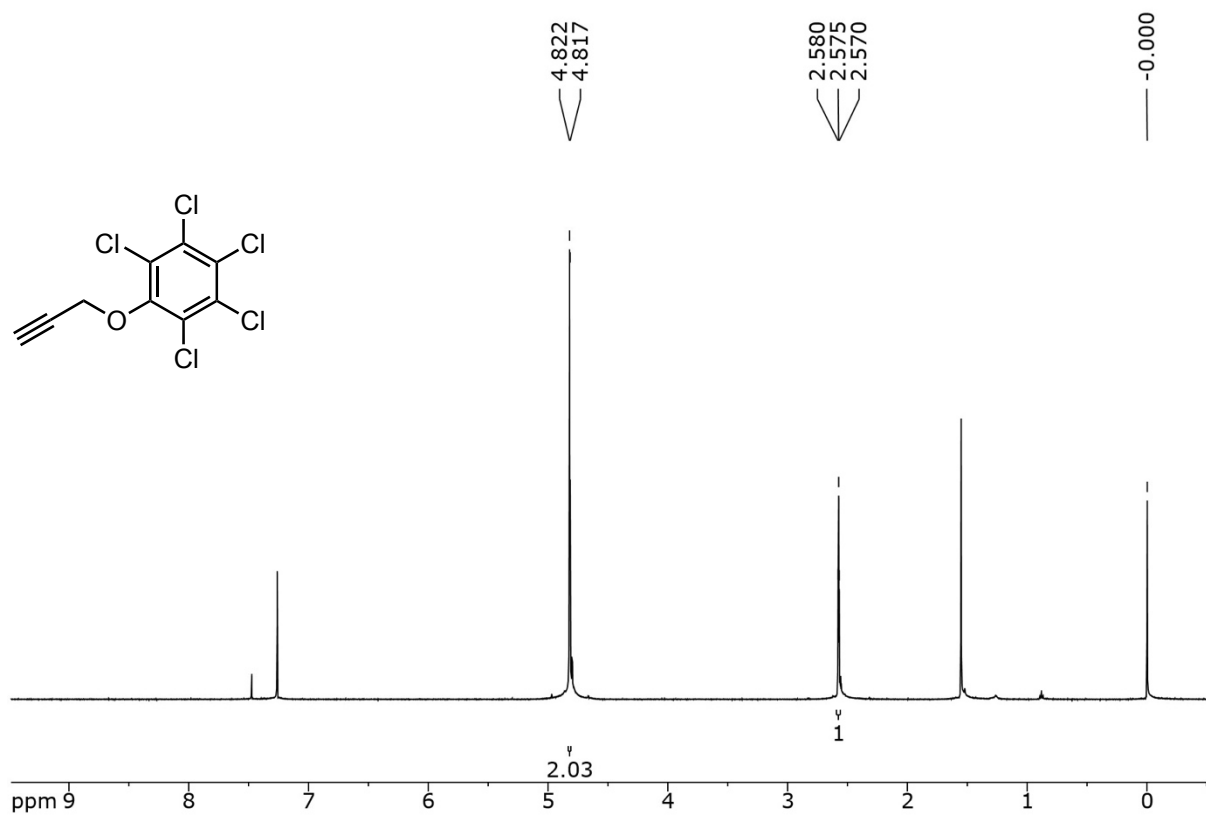

**Fig. S34** <sup>1</sup>H NMR spectrum of compound **5Cl** (500 MHz, CDCl<sub>3</sub>, r.t.).

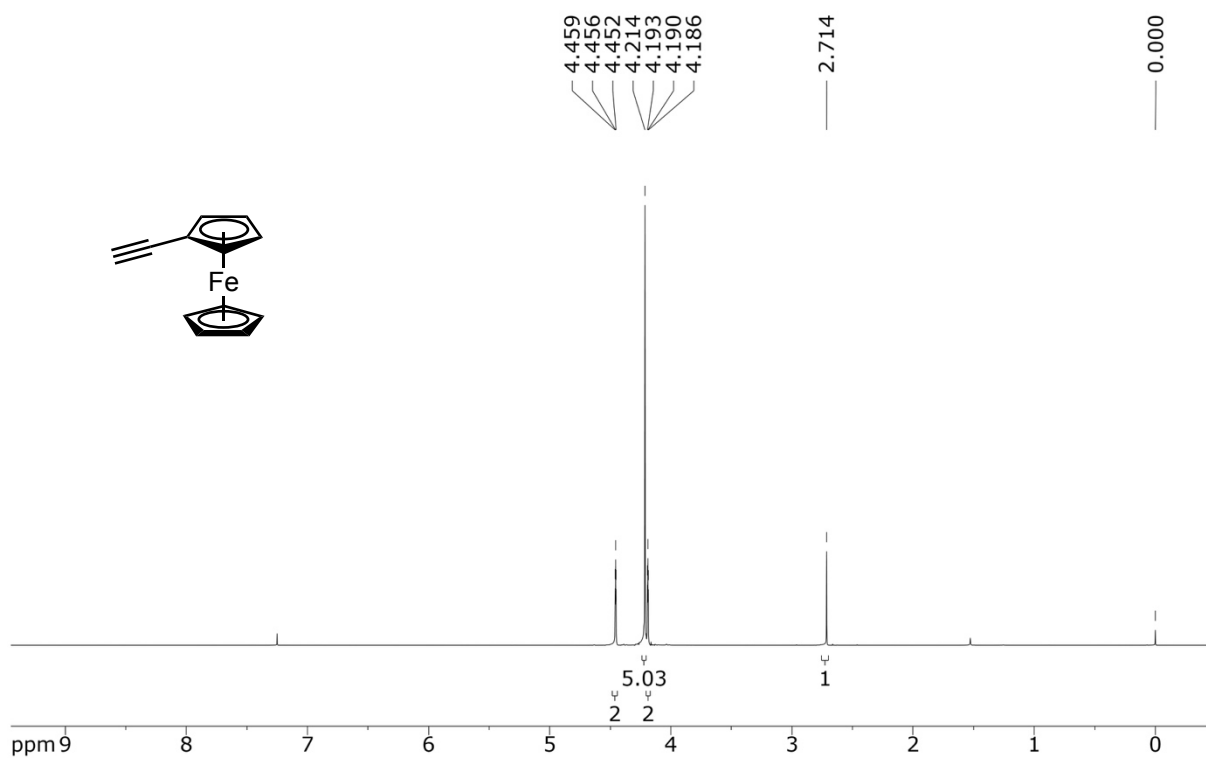

**Fig. S35** <sup>1</sup>H NMR spectrum of compound **S5** (500 MHz, CDCl<sub>3</sub>, r.t.).

## 8. References

- 1 A. B. Pangborn, M. A. Giardello, R. H. Grubbs, R. K. Rosen and F. J. Timmers, *Organometallics*, 1996, **15**, 1518–1520.
- 2 D. Toulemon, B. P. Pichon, C. Leuvrey, S. Zafeiratos, V. Papaefthimiou, X. Cattoën and S. Bégin-Colin, *Chem. Mater.*, 2013, **25**, 2849–2854.
- 3 M. Ikenberry, L. Peña, D. Wei, H. Wang, S. H. Bossmann, T. Wilke, D. Wang, V. R. Komreddy, D. P. Rillema and K. L. Hohn, *Green Chem.*, 2014, **16**, 836–843.
- 4 D. Lasányi and G. Tolnai, *Org. Lett.*, 2019, **21**, 10057–10062.
- 5 L. Singh, D. Fontinha, D. Francisco, A. M. Mendes, M. Prudêncio and K. Singh, *J. Med. Chem.*, 2020, **63**, 1750–1762.
- 6 Y. Zhang, M. K. Ram, E. K. Stefanakos and D. Y. Goswami, *J. Nanomater.*, 2012, **2012**, 624520.
- 7 C. R. Harris, K. J. Millman, S. J. van der Walt, R. Gommers, P. Virtanen, D. Cournapeau, E. Wieser, J. Taylor, S. Berg, N. J. Smith, R. Kern, M. Picus, S. Hoyer, M. H. van Kerkwijk, M. Brett, A. Haldane, J. F. del Río, M. Wiebe, P. Peterson, P. Gérard-Marchant, K. Sheppard, T. Reddy, W. Weckesser, H. Abbasi, C. Gohlke and T. E. Oliphant, *Nature*, 2020, **585**, 357–362.
- 8 GitHub - ialxn/JEOL\_eds: A python module to read binary data files by JEOL's Analysis Station software. [https://github.com/ialxn/JEOL\\_eds](https://github.com/ialxn/JEOL_eds) (Accessed 5 Mar 2025).
- 9 R. Yamaguchi, T. Hosomi, M. Otani, K. Nagashima, T. Takahashi, G. Zhang, M. Kanai, H. Masai, J. Terao and T. Yanagida, *Langmuir*, 2021, **37**, 5172–5179.
- 10 Q.-C. Jiang, T. Iwai, M. Jo, T. Hosomi, T. Yanagida, K. Uchida, K. Hashimoto, T. Nakazono, Y. Yamada, A. Kobayashi, S. Takizawa, H. Masai and J. Terao, *Small*, 2024, **20**, 2403717.
